# Supplementary material for: New data from the first discovered paleoparadoxiid (Desmostylia) specimen shed light into the morphological variation of the genus Neoparadoxia
Source: Sci Rep. 2022 Aug 21;12:14246. doi: 10.1038/s41598-022-18295-5 (PMC9393157; doi:10.1038/s41598-022-18295-5)
Supplement: Supplementary file 2 — Supplementary Table S1. [file 41598_2022_18295_MOESM2_ESM.xlsx]

## Sheet: specimens
Table S1 The list of comparative specimens used int his study.
genus	species	Institution	number	type	references	comments
Archaeoparadoxia	weltoni	UCMP	114285	holotype	Clark, 1991	skull, mandible with molars and postcranial materials
Paleoparadoxia	tabatai	?	?	holotype	Tokunaga, 1939	Isolated m2/3. This specimen was lost during the WWII, but Tokunaga pictured this specimen in his paper.
Paleoparadoxia	tabatai	NMNS	V 5601	neotype	Ijiri and Kamei, 1961	skull, mandible with molars and postcranial materials
Paleoparadoxia	sp.	USNM	299942		Mitchell, 1963	m3?
Paleoparadoxia	sp.	-	-		Inuzuka and Murai, 1980	m3
Paleoparadoxia	sp.	-	-		Inuzuka, 2005	m3
Neoparadoxia	cecilialina	LACM	150150	holotype	Barnes, 2013	skull, mandible with molars and postcranial materials
Neoparadoxia	repenningi	UCMP	81302	holotype	Inuzuka, 2005; Domning and Barnes, 2007	mandible without molars and postcranial materials
Barnes, L. G. A new genus and species of late Miocene Paleoparadoxiid (Mammalia, Desmostylia) from California. Contrib. Sci. 521, 51–114 (2013).
Clark, J. M. A new early miocene species of Paleoparadoxia (mammalia: Desmostylia) from California. J. Vertebr. Paleontol. 11, 490–508 (1991).
Domning, D. P. & Beatty, B. L. Use of tusks in feeding by dugongid sirenians: Observations and tests of hypotheses. Anat. Rec. 290, 523–538 (2007).
Ijiri, S. & Kamei, T. The Association for the Geological Collaboration in Japan (AGCJ) NII-Electronic Library Service. Earth Sci. (Chikyu Kagaku) 53, 1–27 (1961).
Inuzuka, N. & Murai, T. On a left third inferior molar of Paleoparadoxia tabatai from the Moniwa Formation, Miyagi prefecture. Earth Sci. (Chikyu Kagaku) 34, 105–108 (1980).
Inuzuka, N. The Stanford Skeleton of Paleoparadoxia ( Mammalia : Desmostylia ) The Stanford Skeleton of Paleoparadoxia ( Mammalia : Desmostylia ). Bull. Ashoro Museum Paleontol. 3, 3–110 (2005).
Mitchell, E. D. Brachydont desmostylian from Miocene of San Clemente Island, California. Bull. South. Calif. Acad. Sci. 64, 192–201 (1963).
Tokunaga, S. A new fossil mammal belonging to the Desmostylidae. in Jubilee publication commemorating Prof. H. Yabe, M.I.A., sixtieth birthday 289–299 (Tohoku Imperial University, Institute of Geology and Paleontology, 1939).
