# Supplementary material for: New data from the first discovered paleoparadoxiid (Desmostylia) specimen shed light into the morphological variation of the genus Neoparadoxia
Source: Sci Rep. 2022 Aug 21;12:14246. doi: 10.1038/s41598-022-18295-5 (PMC9393157; doi:10.1038/s41598-022-18295-5)
Supplement: Supplementary file 5 — Supplementary Information 5. [file 41598_2022_18295_MOESM5_ESM.csv]

Data Provider	The Paleobiology Database
Data Source	The Paleobiology Database
Data License	Creative Commons CC-BY
License URL	http://creativecommons.org/licenses/by/4.0/
Documentation URL	http://paleobiodb.org/data1.2/occs/list_doc.html
Data URL	http://paleobiodb.org/data1.2/occs/list.csv?datainfo&rowcount&cc=NOA,US&state=California&county=Riverside
Access Time	Sun 2021-08-22 23:11:10 GMT
Title	PBDB Data Service
Parameters:
	cc	NOA,US
	state	California
	county	Riverside
	timerule	major
	taxon_status	all
Elapsed Time	0.0734
Records Found	894
Records Returned	894
Records:
occurrence_no	record_type	reid_no	flags	collection_no	identified_name	identified_rank	identified_no	difference	accepted_name	accepted_rank	accepted_no	early_interval	late_interval	max_ma	min_ma	reference_no
182708	occ	4967		17765	Merychyus cf. minimus	species	48236		Merychyus minimus	species	48236	Arikareean		30.8	20.43	6294
191799	occ			19386	Repomys gustelyi	species	51335		Repomys gustelyi	species	51335	Hemphillian		10.3	4.9	938
191905	occ			19417	Camelidae indet.	family	42513		Camelidae	family	42513	Clarendonian		13.6	10.3	2793
191906	occ			19417	Felidae indet.	family	41045		Felidae	family	41045	Clarendonian		13.6	10.3	2793
191907	occ	7985		19417	Merychyus cf. major	species	48234	recombined as	Ustatochoerus major	species	48234	Clarendonian		13.6	10.3	6294
191999	occ			19445	Borophagus secundus	species	44603		Borophagus secundus	species	44603	Late Hemphillian		10.3	4.9	3558
192000	occ	8021		19445	Caninae indet.	subfamily	90655		Caninae	subfamily	90655	Late Hemphillian		10.3	4.9	6294
192001	occ	8022		19445	Felinae indet.	subfamily	57432		Felinae	subfamily	57432	Late Hemphillian		10.3	4.9	6294
192002	occ	8023		19445	Felinae indet.	subfamily	57432		Felinae	subfamily	57432	Late Hemphillian		10.3	4.9	6294
192003	occ	8024		19445	Agriotherium sp.	genus	41303		Agriotherium	genus	41303	Late Hemphillian		10.3	4.9	6294
192004	occ			19445	Plionarctos n. sp. edensis	species	50584		Plionarctos edensis	species	50584	Late Hemphillian		10.3	4.9	1976
192005	occ			19445	Procyon ? sp.	genus	41262		Procyon	genus	41262	Late Hemphillian		10.3	4.9	1028
192006	occ			19445	Hypolagus n. sp. edensis	species	47233		Hypolagus edensis	species	47233	Late Hemphillian		10.3	4.9	1548
192007	occ			19445	Repomys maxumi	species	51336		Repomys maxumi	species	51336	Late Hemphillian		10.3	4.9	2491
192008	occ			19445	Megatheriidae indet.	family	43608		Megatheriidae	family	43608	Late Hemphillian		10.3	4.9	1548
192009	occ	8025		19445	Megalonychidae indet.	family	43596		Megalonychidae	family	43596	Late Hemphillian		10.3	4.9	1919
192010	occ	8026		19445	Tayassu edensis	species	52097		Tayassu edensis	species	50905	Late Hemphillian		10.3	4.9	6294
192011	occ	8027		19445	Tayassuinae indet.	subfamily	97096		Tayassuinae	subfamily	97096	Late Hemphillian		10.3	4.9	6294
192012	occ	8028		19445	Megacamelus merriami	species	47969		Megacamelus merriami	species	50500	Late Hemphillian		10.3	4.9	6294
192013	occ	8029		19445	Camelidae indet.	family	42513		Camelidae	family	42513	Late Hemphillian		10.3	4.9	6294
192014	occ	8030		19445	Pediomeryx hemphillensis	species	50059		Pediomeryx hemphillensis	species	50059	Late Hemphillian		10.3	4.9	6222
192015	occ			19445	Texoceros ? n. sp. edensis	species	52232		Texoceros edensis	species	52232	Late Hemphillian		10.3	4.9	6222
192016	occ			19445	Dinohippus leidyanus	species	45784		Dinohippus leidyanus	species	50541	Late Hemphillian		10.3	4.9	970
192017	occ	8031		19445	Teleoceras hicksi	species	52113		Teleoceras hicksi	species	52113	Late Hemphillian		10.3	4.9	6218
192018	occ	8032		19445	Rhynchotherium falconeri	species	51364		Rhynchotherium falconeri	species	51364	Late Hemphillian		10.3	4.9	2491
193367	occ			19667	Megalonyx sp.	genus	43603		Megalonyx	genus	43603	Blancan		4.9	1.8	1548
193368	occ			19667	Camelidae indet.	family	42513		Camelidae	family	42513	Blancan		4.9	1.8	1548
193369	occ			19667	Cervidae ? indet.	family	42652		Cervidae	family	42652	Blancan		4.9	1.8	1548
193370	occ	8492		19667	Equus simplicidens	species	46308	recombined as	Plesippus simplicidens	species	46308	Blancan		4.9	1.8	6294
193483	occ	8522		19712	Hypolagus vetus	species	47246		Hypolagus vetus	species	47658	Blancan		4.9	1.8	3632
193484	occ			19712	Rodentia indet.	order	41370		Rodentia	order	41370	Blancan		4.9	1.8	1682
193485	occ			19712	Equus sp.	genus	42996		Equus	genus	42996	Blancan		4.9	1.8	1682
193486	occ			19712	Nannippus ? sp.	genus	43012		Nannippus	genus	104804	Blancan		4.9	1.8	1682
193490	occ	8524		19714	Megalonyx sp.	genus	43603		Megalonyx	genus	43603	Blancan		4.9	1.8	929
193491	occ			19714	Scapanus sp.	genus	40425		Scapanus	genus	40425	Blancan		4.9	1.8	1993
193492	occ	8525		19714	Hypolagus edensis	species	47233		Hypolagus edensis	species	47233	Blancan		4.9	1.8	2725
193493	occ	8526		19714	Hypolagus vetus	species	47246		Hypolagus vetus	species	47658	Blancan		4.9	1.8	3632
193494	occ			19714	Sciuridae indet.	family	41486		Sciuridae	family	41486	Blancan		4.9	1.8	1682
193495	occ	8527		19714	Perognathinae indet.	subfamily	370355		Perognathinae	subfamily	370355	Blancan		4.9	1.8	6294
193496	occ			19714	cf. Dipodomys sp.	genus	41678		Dipodomys	genus	41678	Blancan		4.9	1.8	1682
193497	occ			19714	Neotoma sp.	genus	41822		Neotoma	genus	41822	Blancan		4.9	1.8	1682
193498	occ			19714	Sigmodon sp.	genus	41876		Sigmodon	genus	41876	Blancan		4.9	1.8	1682
193499	occ			19714	Cricetinae indet.	subfamily	91459		Cricetinae	subfamily	91459	Blancan		4.9	1.8	1682
193500	occ	8528		19714	Canini indet.	tribe	300804		Canini	tribe	300804	Blancan		4.9	1.8	6294
193501	occ			19714	Taxidea sp.	genus	41175		Taxidea	genus	41175	Blancan		4.9	1.8	1682
193502	occ	8529		19714	Felidae indet.	family	41045		Felidae	family	41045	Blancan		4.9	1.8	6294
193503	occ			19714	Lynx ? sp.	genus	41058		Lynx	genus	41058	Blancan		4.9	1.8	1682
193504	occ			19714	Proboscidea indet.	order	43230		Proboscidea	order	43230	Blancan		4.9	1.8	1682
193505	occ			19714	Equus sp.	genus	42996		Equus	genus	42996	Blancan		4.9	1.8	1682
193506	occ			19714	Camelops ? sp.	genus	42520		Camelops	genus	42520	Blancan		4.9	1.8	1682
193507	occ			19714	Lamini indet.	tribe	83734		Lamini	tribe	83734	Blancan		4.9	1.8	1682
193508	occ			19714	Odocoileus sp.	genus	42682		Odocoileus	genus	42682	Blancan		4.9	1.8	1682
193509	occ			19714	Tetrameryx sp.	genus	42740		Tetrameryx	genus	42740	Blancan		4.9	1.8	1682
193510	occ			19715	Hypolagus sp.	genus	42173		Hypolagus	genus	42173	Blancan		4.9	1.8	2725
193511	occ			19715	Neotoma (Paraneotoma) quadriplicata	species	108855	recombined as	Neotoma quadriplicata	species	49856	Blancan		4.9	1.8	2725
193512	occ			19715	Neotoma (Paraneotoma) taylori	species	49139	obsolete variant of	Neotoma taylori	species	49139	Blancan		4.9	1.8	2725
193513	occ	8530		19715	Geomyidae indet.	family	41651		Geomyidae	family	41651	Blancan		4.9	1.8	6294
193514	occ	8531		19715	Perognathinae indet.	subfamily	370355		Perognathinae	subfamily	370355	Blancan		4.9	1.8	6294
193515	occ			19715	Cupidinimus cf. bidahochiensis	species	45386		Cupidinimus bidahochiensis	species	50178	Blancan		4.9	1.8	2725
193516	occ	8532		19715	Bensonomys arizonae	species	44489	recombined as	Calomys (Bensonomys) arizonae	species	46032	Blancan		4.9	1.8	6294
193517	occ	8533		19715	Antecalomys vasquezi	species	44120		Antecalomys vasquezi	species	45255	Blancan		4.9	1.8	6294
193518	occ			19715	Copemys ? sp.	genus	41751		Copemys	genus	41751	Blancan		4.9	1.8	2725
193519	occ	8534		19715	Antecalomys valensis	species	44119		Antecalomys valensis	species	50275	Blancan		4.9	1.8	6294
193520	occ	8535		19715	Sigmodon medius	species	51553	subjective synonym of	Sigmodon minor	species	51554	Blancan		4.9	1.8	6294
193521	occ			19715	Onychomys gidleyi	species	49347		Onychomys gidleyi	species	49347	Blancan		4.9	1.8	2725
193522	occ			19715	Paronychomys ? sp.	genus	41835		Paronychomys	genus	41835	Blancan		4.9	1.8	2725
193523	occ			19716	Hypolagus sp.	genus	42173		Hypolagus	genus	42173	Blancan		4.9	1.8	2725
193524	occ	8536		19716	Perognathinae indet.	subfamily	370355		Perognathinae	subfamily	370355	Blancan		4.9	1.8	6294
193525	occ			19716	Neotoma sp.	genus	41822		Neotoma	genus	41822	Blancan		4.9	1.8	2725
193526	occ			19716	Sigmodon sp.	genus	41876		Sigmodon	genus	41876	Blancan		4.9	1.8	2725
193527	occ			19716	Equus sp.	genus	42996		Equus	genus	42996	Blancan		4.9	1.8	2725
193528	occ			19716	Antilocapridae indet.	family	42720		Antilocapridae	family	42720	Blancan		4.9	1.8	2725
193529	occ			19717	Equus sp.	genus	42996		Equus	genus	42996	Blancan		4.9	1.8	1682
193530	occ			19717	Nannippus ? sp.	genus	43012		Nannippus	genus	104804	Blancan		4.9	1.8	1682
193531	occ			19717	Camelidae indet.	family	42513		Camelidae	family	42513	Blancan		4.9	1.8	1682
193532	occ			19718	Hypolagus cf. edensis	species	47233		Hypolagus edensis	species	47233	Blancan		4.9	1.8	2725
193533	occ			19718	Hypolagus sp.	genus	42173		Hypolagus	genus	42173	Blancan		4.9	1.8	2725
193534	occ			19718	Hypolagus cf. vetus	species	47246		Hypolagus vetus	species	47658	Blancan		4.9	1.8	2725
193535	occ			19718	Neotoma (Paraneotoma) sawrockensis	species	49136		Neotoma (Paraneotoma) sawrockensis	species	49136	Blancan		4.9	1.8	2725
193536	occ	8537		19718	Geomyidae indet.	family	41651		Geomyidae	family	41651	Blancan		4.9	1.8	6294
193537	occ	8538		19718	Perognathinae indet.	subfamily	370355		Perognathinae	subfamily	370355	Blancan		4.9	1.8	6294
193538	occ	8539		19718	Bensonomys gidleyi	species	44494	recombined as	Calomys (Bensonomys) gidleyi	species	44786	Blancan		4.9	1.8	6294
193539	occ			19719	Hypolagus sp.	genus	42173		Hypolagus	genus	42173	Blancan		4.9	1.8	2725
193540	occ			19719	Neotoma (Paraneotoma) sawrockensis	species	49136		Neotoma (Paraneotoma) sawrockensis	species	49136	Blancan		4.9	1.8	2725
193541	occ	8540		19719	Geomyidae indet.	family	41651		Geomyidae	family	41651	Blancan		4.9	1.8	6294
193542	occ			19719	Thomomys cf. gidleyi	species	52277		Thomomys gidleyi	species	52277	Blancan		4.9	1.8	2725
193543	occ			19719	Thomomys cf. bottae	species	52275		Thomomys bottae	species	49453	Blancan		4.9	1.8	2725
193544	occ			19719	Cupidinimus cf. bidahochiensis	species	45386		Cupidinimus bidahochiensis	species	50178	Blancan		4.9	1.8	2725
193545	occ	8541		19719	Bensonomys gidleyi	species	44494	recombined as	Calomys (Bensonomys) gidleyi	species	44786	Blancan		4.9	1.8	6294
193546	occ	8542		19719	Antecalomys vasquezi	species	44120		Antecalomys vasquezi	species	45255	Blancan		4.9	1.8	6294
193547	occ	8543		19719	Antecalomys valensis	species	44119		Antecalomys valensis	species	50275	Blancan		4.9	1.8	6294
193548	occ			19719	Paronychomys ? sp.	genus	41835		Paronychomys	genus	41835	Blancan		4.9	1.8	2725
193549	occ			19720	Hypolagus cf. edensis	species	47233		Hypolagus edensis	species	47233	Blancan		4.9	1.8	2725
193550	occ			19720	Hypolagus sp.	genus	42173		Hypolagus	genus	42173	Blancan		4.9	1.8	2725
193551	occ			19720	Neotoma (Paraneotoma) sawrockensis	species	49136		Neotoma (Paraneotoma) sawrockensis	species	49136	Blancan		4.9	1.8	2725
193552	occ	8544		19720	Geomyidae indet.	family	41651		Geomyidae	family	41651	Blancan		4.9	1.8	6294
193553	occ			19720	Thomomys cf. gidleyi	species	52277		Thomomys gidleyi	species	52277	Blancan		4.9	1.8	2725
193554	occ			19721	Leporidae indet.	family	42163		Leporidae	family	42163	Blancan		4.9	1.8	2725
193555	occ			19721	Sciuridae indet.	family	41486		Sciuridae	family	41486	Blancan		4.9	1.8	2725
193556	occ			19721	Thomomys sp.	genus	41671		Thomomys	genus	41671	Blancan		4.9	1.8	2725
193557	occ	8545		19721	Perognathinae indet.	subfamily	370355		Perognathinae	subfamily	370355	Blancan		4.9	1.8	6294
193558	occ	8546		19721	Neotoma fossilis	species	49119		Neotoma fossilis	species	49119	Blancan		4.9	1.8	6294
193559	occ			19721	Sigmodon sp.	genus	41876		Sigmodon	genus	41876	Blancan		4.9	1.8	2725
193560	occ			19721	cf. Peromyscus sp.	genus	41837		Peromyscus	genus	41837	Blancan		4.9	1.8	2725
193561	occ			19721	Equus sp.	genus	42996		Equus	genus	42996	Blancan		4.9	1.8	2725
193562	occ			19722	Leporidae indet.	family	42163		Leporidae	family	42163	Blancan		4.9	1.8	2725
193563	occ			19722	Thomomys sp.	genus	41671		Thomomys	genus	41671	Blancan		4.9	1.8	2725
193564	occ			19722	Dipodomys ? sp.	genus	41678		Dipodomys	genus	41678	Blancan		4.9	1.8	2725
193565	occ			19722	Sigmodon sp.	genus	41876		Sigmodon	genus	41876	Blancan		4.9	1.8	2725
193566	occ			19722	Peromyscus sp.	genus	41837		Peromyscus	genus	41837	Blancan		4.9	1.8	2725
193567	occ			19723	Leporidae indet.	family	42163		Leporidae	family	42163	Blancan		4.9	1.8	2725
193568	occ			19723	Neotoma sp.	genus	41822		Neotoma	genus	41822	Blancan		4.9	1.8	2725
193569	occ			19724	cf. Antilocapra sp.	genus	42721		Antilocapra	genus	42721	Blancan		4.9	1.8	2725
193570	occ			19725	Scapanus ? sp.	genus	40425		Scapanus	genus	40425	Blancan		4.9	1.8	2725
193571	occ			19725	Leporidae indet.	family	42163		Leporidae	family	42163	Blancan		4.9	1.8	2725
193572	occ			19725	Dipodomys ? sp.	genus	41678		Dipodomys	genus	41678	Blancan		4.9	1.8	2725
193573	occ	8547		19725	Perognathinae indet.	subfamily	370355		Perognathinae	subfamily	370355	Blancan		4.9	1.8	6294
193574	occ	8548		19725	Neotoma fossilis	species	49119		Neotoma fossilis	species	49119	Blancan		4.9	1.8	6294
193575	occ			19725	Sigmodon sp.	genus	41876		Sigmodon	genus	41876	Blancan		4.9	1.8	2725
193576	occ			19725	Equus sp.	genus	42996		Equus	genus	42996	Blancan		4.9	1.8	2725
193577	occ			19726	Lepus sp.	genus	42176		Lepus	genus	42176	Blancan		4.9	1.8	2725
193578	occ			19726	Thomomys ? sp.	genus	41671		Thomomys	genus	41671	Blancan		4.9	1.8	2725
193579	occ	8549		19726	Neotoma fossilis	species	49119		Neotoma fossilis	species	49119	Blancan		4.9	1.8	6294
193580	occ			19726	Sigmodon sp.	genus	41876		Sigmodon	genus	41876	Blancan		4.9	1.8	2725
193581	occ			19727	Equus sp.	genus	42996		Equus	genus	42996	Blancan		4.9	1.8	2725
193582	occ			19728	Prodipodomys timoteoensis	species	50766		Prodipodomys timoteoensis	species	50766	Blancan		4.9	1.8	939
193583	occ			19729	Archaeolaginae ? indet.	subfamily	104807		Archaeolaginae	subfamily	104807	Blancan		4.9	1.8	939
193584	occ			19729	Prodipodomys timoteoensis	species	50766		Prodipodomys timoteoensis	species	50766	Blancan		4.9	1.8	939
193585	occ			19730	Thomomys gidleyi	species	52277		Thomomys gidleyi	species	52277	Blancan		4.9	1.8	939
193586	occ			19730	Prodipodomys timoteoensis	species	50766		Prodipodomys timoteoensis	species	50766	Blancan		4.9	1.8	939
193587	occ			19730	Prodipodomys n. sp. riversidensis	species	50764		Prodipodomys riversidensis	species	50764	Blancan		4.9	1.8	939
193588	occ			19730	Peromyscus cf. hagermanensis	species	50248		Peromyscus hagermanensis	species	50248	Blancan		4.9	1.8	939
193589	occ	8550		19731	Thomomys gidleyi	species	52277		Thomomys gidleyi	species	52277	Blancan		4.9	1.8	939
193590	occ			19732	Thomomys gidleyi	species	52277		Thomomys gidleyi	species	52277	Blancan		4.9	1.8	939
193591	occ			19732	Prodipodomys timoteoensis	species	50766		Prodipodomys timoteoensis	species	50766	Blancan		4.9	1.8	939
193592	occ			19732	Prodipodomys riversidensis	species	50764		Prodipodomys riversidensis	species	50764	Blancan		4.9	1.8	939
193593	occ			19732	Peromyscus cf. hagermanensis	species	50248		Peromyscus hagermanensis	species	50248	Blancan		4.9	1.8	939
193594	occ			19733	Sigmodon medius	species	51553	subjective synonym of	Sigmodon minor	species	51554	Blancan		4.9	1.8	938
193595	occ			19734	Thomomys gidleyi	species	52277		Thomomys gidleyi	species	52277	Blancan		4.9	1.8	939
193596	occ			19734	Sigmodon medius	species	51553	subjective synonym of	Sigmodon minor	species	51554	Blancan		4.9	1.8	939
193597	occ			19735	Thomomys gidleyi	species	52277		Thomomys gidleyi	species	52277	Blancan		4.9	1.8	939
193598	occ	8551		19735	Neotoma fossilis	species	49119		Neotoma fossilis	species	49119	Blancan		4.9	1.8	939
193599	occ			19736	Thomomys gidleyi	species	52277		Thomomys gidleyi	species	52277	Blancan		4.9	1.8	938
193600	occ			19736	Reynoldsomys n. sp. timoteoensis	species	51338		Reynoldsomys timoteoensis	species	51338	Blancan		4.9	1.8	939
193601	occ			19736	Perognathinae indet.	subfamily	370355		Perognathinae	subfamily	370355	Blancan		4.9	1.8	938
193602	occ			19736	Prodipodomys idahoensis	species	50759		Prodipodomys idahoensis	species	50759	Blancan		4.9	1.8	938
193603	occ			19736	Prodipodomys timoteoensis	species	50766		Prodipodomys timoteoensis	species	50766	Blancan		4.9	1.8	939
193604	occ			19736	Prodipodomys sp.	genus	41689		Prodipodomys	genus	41689	Blancan		4.9	1.8	938
193605	occ			19736	Peromyscus hagermanensis	species	50248		Peromyscus hagermanensis	species	50248	Blancan		4.9	1.8	938
193606	occ			19736	Peromyscus baumgartneri	species	50231		Peromyscus baumgartneri	species	50231	Blancan		4.9	1.8	938
193607	occ			19736	Peromyscus complexus	species	50237		Peromyscus complexus	species	50237	Blancan		4.9	1.8	939
193608	occ			19736	Sigmodon medius	species	51553	subjective synonym of	Sigmodon minor	species	51554	Blancan		4.9	1.8	938
193609	occ			19736	Neotoma (Paraneotoma) fossilis	species	49119	obsolete variant of	Neotoma fossilis	species	49119	Blancan		4.9	1.8	938
193610	occ	8552		19736	Baiomys mowi	species	44417		Baiomys mowi	species	44417	Blancan		4.9	1.8	939
193611	occ			19737	Ophiomys sp.	genus	49359	subjective synonym of	Mimomys	genus	41812	Blancan		4.9	1.8	938
193612	occ			19737	Erethizon cascoensis ?	species	46318		Erethizon cascoensis	species	45182	Blancan		4.9	1.8	938
193613	occ	8553		19737	Equus idahoensis	species	46277	recombined as	Plesippus idahoensis	species	46277	Blancan		4.9	1.8	6294
193614	occ			19737	Sorex leahyi	species	51648		Sorex leahyi	species	51648	Blancan		4.9	1.8	938
193615	occ			19737	Hypolagus edensis	species	47233		Hypolagus edensis	species	47233	Blancan		4.9	1.8	939
193616	occ			19737	Sylvilagus hibbardi	species	51913		Sylvilagus hibbardi	species	51913	Blancan		4.9	1.8	938
193617	occ			19737	Thomomys gidleyi	species	52277		Thomomys gidleyi	species	52277	Blancan		4.9	1.8	938
193618	occ	8554		19737	Perognathinae indet.	subfamily	370355		Perognathinae	subfamily	370355	Blancan		4.9	1.8	939
193619	occ			19737	Dipodomys sp.	genus	41678		Dipodomys	genus	41678	Blancan		4.9	1.8	939
193620	occ			19737	Peromyscus hagermanensis	species	50248		Peromyscus hagermanensis	species	50248	Blancan		4.9	1.8	938
193621	occ			19737	Peromyscus n. sp. maximus	species	50258		Peromyscus maximus	species	50258	Blancan		4.9	1.8	939
193622	occ			19737	Reithrodontomys sp.	genus	41869		Reithrodontomys	genus	41869	Blancan		4.9	1.8	939
193623	occ			19737	Sigmodon medius	species	51553	subjective synonym of	Sigmodon minor	species	51554	Blancan		4.9	1.8	938
193624	occ			19737	Neotoma fossilis	species	49119		Neotoma fossilis	species	49119	Blancan		4.9	1.8	938
193625	occ			19738	Ophiomys sp.	genus	49359	subjective synonym of	Mimomys	genus	41812	Blancan		4.9	1.8	938
193626	occ			19738	Sorex leahyi	species	51648		Sorex leahyi	species	51648	Blancan		4.9	1.8	938
193627	occ			19738	Sylvilagus hibbardi	species	51913		Sylvilagus hibbardi	species	51913	Blancan		4.9	1.8	938
193628	occ			19738	Thomomys gidleyi	species	52277		Thomomys gidleyi	species	52277	Blancan		4.9	1.8	938
193629	occ	8555		19738	Perognathinae indet.	subfamily	370355		Perognathinae	subfamily	370355	Blancan		4.9	1.8	939
193630	occ			19738	Peromyscus hagermanensis	species	50248		Peromyscus hagermanensis	species	50248	Blancan		4.9	1.8	938
193631	occ			19738	Peromyscus n. sp. complexus	species	50237		Peromyscus complexus	species	50237	Blancan		4.9	1.8	939
193632	occ			19738	Sigmodon medius	species	51553	subjective synonym of	Sigmodon minor	species	51554	Blancan		4.9	1.8	938
193633	occ			19738	Neotoma fossilis	species	49119		Neotoma fossilis	species	49119	Blancan		4.9	1.8	938
193634	occ			19739	Neotoma fossilis	species	49119		Neotoma fossilis	species	49119	Blancan		4.9	1.8	938
193635	occ			19739	Prodipodomys sp.	genus	41689		Prodipodomys	genus	41689	Blancan		4.9	1.8	938
193636	occ			19739	Dipodomys sp.	genus	41678		Dipodomys	genus	41678	Blancan		4.9	1.8	938
193637	occ			19739	Peromyscus cf. hagermanensis	species	50248		Peromyscus hagermanensis	species	50248	Blancan		4.9	1.8	939
193638	occ			19740	Archaeolaginae ? indet.	subfamily	104807		Archaeolaginae	subfamily	104807	Blancan		4.9	1.8	939
193639	occ			19740	Sylvilagus sp.	genus	42193		Sylvilagus	genus	42193	Blancan		4.9	1.8	938
193640	occ	8556		19740	Thomomys gidleyi	species	52277		Thomomys gidleyi	species	52277	Blancan		4.9	1.8	939
193641	occ	8557		19740	Perognathinae indet.	subfamily	370355		Perognathinae	subfamily	370355	Blancan		4.9	1.8	6294
193642	occ			19740	Dipodomys sp.	genus	41678		Dipodomys	genus	41678	Blancan		4.9	1.8	938
193643	occ			19740	Prodipodomys n. sp. timoteoensis	species	50766		Prodipodomys timoteoensis	species	50766	Blancan		4.9	1.8	939
193644	occ			19740	Prodipodomys sp.	genus	41689		Prodipodomys	genus	41689	Blancan		4.9	1.8	938
193645	occ			19740	Peromyscus cf. hagermanensis	species	50248		Peromyscus hagermanensis	species	50248	Blancan		4.9	1.8	939
193646	occ			19740	Peromyscus baumgartneri ?	species	50231		Peromyscus baumgartneri	species	50231	Blancan		4.9	1.8	938
193647	occ			19740	Peromyscus maximus	species	50258		Peromyscus maximus	species	50258	Blancan		4.9	1.8	939
193648	occ			19740	Sigmodon medius	species	51553	subjective synonym of	Sigmodon minor	species	51554	Blancan		4.9	1.8	938
193649	occ			19740	Neotoma fossilis	species	49119		Neotoma fossilis	species	49119	Blancan		4.9	1.8	939
193650	occ			19741	Sigmodon medius	species	51553	subjective synonym of	Sigmodon minor	species	51554	Blancan		4.9	1.8	939
193651	occ			19742	Prodipodomys sp.	genus	41689		Prodipodomys	genus	41689	Blancan		4.9	1.8	939
193652	occ			19742	Sigmodon medius	species	51553	subjective synonym of	Sigmodon minor	species	51554	Blancan		4.9	1.8	939
193653	occ			19743	Plionarctos sp.	genus	41322		Plionarctos	genus	41322	Blancan		4.9	1.8	1976
196059	occ			20149	Proboscidea indet.	order	43230		Proboscidea	order	43230	Irvingtonian	Rancholabrean	1.8	0.012	2018
196103	occ			20155	Lepus sp.	genus	42176		Lepus	genus	42176	Irvingtonian		1.8	0.3	1548
196104	occ			20155	Megalonyx ? sp.	genus	43603		Megalonyx	genus	43603	Irvingtonian		1.8	0.3	1548
196105	occ			20155	Camelidae ? indet.	family	42513		Camelidae	family	42513	Irvingtonian		1.8	0.3	1548
196106	occ			20155	Odocoileus ? sp.	genus	42682		Odocoileus	genus	42682	Irvingtonian		1.8	0.3	1548
196107	occ			20155	Capromeryx ? sp.	genus	42722		Capromeryx	genus	42722	Irvingtonian		1.8	0.3	1548
196108	occ			20155	Antilocapra ? sp.	genus	42721		Antilocapra	genus	42721	Irvingtonian		1.8	0.3	1548
196109	occ	9202		20155	Equus scotti	species	46305		Equus scotti	species	46305	Irvingtonian		1.8	0.3	6294
196110	occ			20155	Tapirus n. sp. merriami	species	52066		Tapirus merriami	species	52066	Irvingtonian		1.8	0.3	1548
196254	occ			20173	Microchiroptera indet.	suborder	40627		Microchiroptera	suborder	40627	Irvingtonian		1.8	0.3	2893
196255	occ			20173	Sylvilagus sp.	genus	42193		Sylvilagus	genus	42193	Irvingtonian		1.8	0.3	2893
196256	occ			20173	Leporidae indet.	family	42163		Leporidae	family	42163	Irvingtonian		1.8	0.3	2893
196257	occ			20173	Spermophilus ? sp.	genus	41528		Spermophilus	genus	41528	Irvingtonian		1.8	0.3	2893
196258	occ			20173	Sciuridae indet.	family	41486		Sciuridae	family	41486	Irvingtonian		1.8	0.3	2893
196259	occ			20173	Thomomys sp.	genus	41671		Thomomys	genus	41671	Irvingtonian		1.8	0.3	2893
196260	occ			20173	Dipodomys sp.	genus	41678		Dipodomys	genus	41678	Irvingtonian		1.8	0.3	2893
196261	occ			20173	Peromyscus sp.	genus	41837		Peromyscus	genus	41837	Irvingtonian		1.8	0.3	2893
196262	occ			20173	Neotoma (Neotoma) sp.	subgenus	41822	obsolete variant of	Neotoma	genus	41822	Irvingtonian		1.8	0.3	2893
196263	occ			20173	Clethrionomys sp.	genus	41749	subjective synonym of	Myodes	genus	104931	Irvingtonian		1.8	0.3	2893
196264	occ			20173	Microtus sp.	genus	41810		Microtus	genus	41810	Irvingtonian		1.8	0.3	2893
196265	occ			20173	Canis cf. latrans	species	44854		Canis latrans	species	44854	Irvingtonian		1.8	0.3	2893
196266	occ			20173	Mammut sp.	genus	43274		Mammut	genus	43274	Irvingtonian		1.8	0.3	2893
196267	occ			20173	Equus sp.	genus	42996		Equus	genus	42996	Irvingtonian		1.8	0.3	2893
196268	occ			20174	Thomomys sp.	genus	41671		Thomomys	genus	41671	Irvingtonian		1.8	0.3	2725
196269	occ			20174	Sigmodon ? sp.	genus	41876		Sigmodon	genus	41876	Irvingtonian		1.8	0.3	2725
196270	occ			20174	Peromyscus sp.	genus	41837		Peromyscus	genus	41837	Irvingtonian		1.8	0.3	2725
196271	occ	9231		20174	Ophiomys parvus	species	49364		Ophiomys parvus	species	48635	Irvingtonian		1.8	0.3	6294
196272	occ			20174	Equus sp.	genus	42996		Equus	genus	42996	Irvingtonian		1.8	0.3	2725
196273	occ			20175	cf. Sigmodon sp.	genus	41876		Sigmodon	genus	41876	Irvingtonian		1.8	0.3	2725
196274	occ			20176	Leporidae indet.	family	42163		Leporidae	family	42163	Irvingtonian		1.8	0.3	2893
196275	occ			20176	Thomomys sp.	genus	41671		Thomomys	genus	41671	Irvingtonian		1.8	0.3	2893
196276	occ			20176	Dipodomys ? sp.	genus	41678		Dipodomys	genus	41678	Irvingtonian		1.8	0.3	2893
196277	occ			20176	Sigmodon minor	species	51554		Sigmodon minor	species	51554	Irvingtonian		1.8	0.3	2893
196278	occ			20176	Sigmodon sp.	genus	41876		Sigmodon	genus	41876	Irvingtonian		1.8	0.3	2893
196279	occ			20176	Antilocapridae indet.	family	42720		Antilocapridae	family	42720	Irvingtonian		1.8	0.3	2893
196280	occ			20177	Sylvilagus sp.	genus	42193		Sylvilagus	genus	42193	Irvingtonian		1.8	0.3	2893
196281	occ			20177	Leporidae indet.	family	42163		Leporidae	family	42163	Irvingtonian		1.8	0.3	2893
196282	occ			20177	Thomomys sp.	genus	41671		Thomomys	genus	41671	Irvingtonian		1.8	0.3	2893
196283	occ			20177	Prodipodomys sp.	genus	41689		Prodipodomys	genus	41689	Irvingtonian		1.8	0.3	2893
196284	occ			20177	Dipodomys sp.	genus	41678		Dipodomys	genus	41678	Irvingtonian		1.8	0.3	2893
196285	occ			20177	Neotoma sp.	genus	41822		Neotoma	genus	41822	Irvingtonian		1.8	0.3	2725
196286	occ			20177	Sigmodon minor	species	51554		Sigmodon minor	species	51554	Irvingtonian		1.8	0.3	2893
196287	occ			20177	Sigmodon sp.	genus	41876		Sigmodon	genus	41876	Irvingtonian		1.8	0.3	2893
196288	occ			20177	Microtus sp.	genus	41810		Microtus	genus	41810	Irvingtonian		1.8	0.3	2893
196289	occ	9232		20177	Equus cf. scotti	species	46305		Equus scotti	species	46305	Irvingtonian		1.8	0.3	6294
196290	occ			20178	Microchiroptera indet.	suborder	40627		Microchiroptera	suborder	40627	Irvingtonian		1.8	0.3	2893
196291	occ			20178	Sylvilagus sp.	genus	42193		Sylvilagus	genus	42193	Irvingtonian		1.8	0.3	2893
196292	occ			20178	Leporidae indet.	family	42163		Leporidae	family	42163	Irvingtonian		1.8	0.3	2893
196293	occ			20178	Sciuridae indet.	family	41486		Sciuridae	family	41486	Irvingtonian		1.8	0.3	2893
196294	occ	9233		20178	Thomomys bottae	species	52275		Thomomys bottae	species	49453	Irvingtonian		1.8	0.3	6294
196295	occ			20178	Perognathinae indet.	subfamily	370355		Perognathinae	subfamily	370355	Irvingtonian		1.8	0.3	2893
196296	occ			20178	Dipodomys sp.	genus	41678		Dipodomys	genus	41678	Irvingtonian		1.8	0.3	2893
196297	occ			20178	Onychomys torridus	species	49354		Onychomys torridus	species	46935	Irvingtonian		1.8	0.3	2893
196298	occ			20178	Sigmodon sp.	genus	41876		Sigmodon	genus	41876	Irvingtonian		1.8	0.3	2893
196299	occ			20178	Neotoma sp.	genus	41822		Neotoma	genus	41822	Irvingtonian		1.8	0.3	2893
196300	occ	9234		20178	Microtus californicus	species	48573		Microtus californicus	species	44333	Irvingtonian		1.8	0.3	6294
196301	occ	9235		20178	Canis ? latrans	species	44854		Canis latrans	species	44854	Irvingtonian		1.8	0.3	6294
196302	occ	9236		20178	Vulpes cf. velox	species	52690		Vulpes velox	species	44888	Irvingtonian		1.8	0.3	6294
196303	occ			20178	cf. Mephitis sp.	genus	41134		Mephitis	genus	41134	Irvingtonian		1.8	0.3	2893
196304	occ			20178	Equus sp.	genus	42996		Equus	genus	42996	Irvingtonian		1.8	0.3	2893
196305	occ			20178	Camelops sp.	genus	42520		Camelops	genus	42520	Irvingtonian		1.8	0.3	2893
196306	occ			20178	Odocoileus sp.	genus	42682		Odocoileus	genus	42682	Irvingtonian		1.8	0.3	2893
196307	occ			20179	Equus sp.	genus	42996		Equus	genus	42996	Irvingtonian		1.8	0.3	2725
196308	occ			20180	Dipodomys sp.	genus	41678		Dipodomys	genus	41678	Irvingtonian		1.8	0.3	2725
196309	occ			20180	Cricetidae indet.	family	41724		Cricetidae	family	41724	Irvingtonian		1.8	0.3	2725
196310	occ	9237		20180	Equus scotti	species	46305		Equus scotti	species	46305	Irvingtonian		1.8	0.3	6294
196311	occ			20181	Leporidae indet.	family	42163		Leporidae	family	42163	Irvingtonian		1.8	0.3	2725
196312	occ			20181	Thomomys bottae	species	52275		Thomomys bottae	species	49453	Irvingtonian		1.8	0.3	2725
196313	occ	9238		20181	Perognathinae indet.	subfamily	370355		Perognathinae	subfamily	370355	Irvingtonian		1.8	0.3	6294
196314	occ			20181	Dipodomys sp.	genus	41678		Dipodomys	genus	41678	Irvingtonian		1.8	0.3	2725
196315	occ			20181	Peromyscus sp.	genus	41837		Peromyscus	genus	41837	Irvingtonian		1.8	0.3	2725
196316	occ			20181	Neotoma sp.	genus	41822		Neotoma	genus	41822	Irvingtonian		1.8	0.3	2725
196317	occ	9239		20181	Ophiomys parvus	species	49364		Ophiomys parvus	species	48635	Irvingtonian		1.8	0.3	6294
196318	occ			20181	Sigmodon sp.	genus	41876		Sigmodon	genus	41876	Irvingtonian		1.8	0.3	2725
196319	occ			20182	Leporidae indet.	family	42163		Leporidae	family	42163	Irvingtonian		1.8	0.3	2893
196320	occ			20182	Thomomys sp.	genus	41671		Thomomys	genus	41671	Irvingtonian		1.8	0.3	2893
196321	occ			20183	Thomomys sp.	genus	41671		Thomomys	genus	41671	Irvingtonian		1.8	0.3	2725
196322	occ			20184	Thomomys sp.	genus	41671		Thomomys	genus	41671	Irvingtonian		1.8	0.3	2725
196323	occ			20184	Prodipodomys ? sp.	genus	41689		Prodipodomys	genus	41689	Irvingtonian		1.8	0.3	2725
196324	occ			20184	Neotoma (Paraneotoma) sp.	subgenus	108854		Neotoma (Paraneotoma)	subgenus	108854	Irvingtonian		1.8	0.3	2725
196325	occ			20184	Neotoma sp.	genus	41822		Neotoma	genus	41822	Irvingtonian		1.8	0.3	2725
196326	occ			20185	Thomomys bottae	species	52275		Thomomys bottae	species	49453	Irvingtonian		1.8	0.3	2725
196327	occ			20186	Leporidae indet.	family	42163		Leporidae	family	42163	Irvingtonian		1.8	0.3	2725
196328	occ			20186	Thomomys bottae	species	52275		Thomomys bottae	species	49453	Irvingtonian		1.8	0.3	2725
196329	occ			20186	Dipodomys sp.	genus	41678		Dipodomys	genus	41678	Irvingtonian		1.8	0.3	2725
196330	occ			20186	Neotoma sp.	genus	41822		Neotoma	genus	41822	Irvingtonian		1.8	0.3	2725
196331	occ			20186	Sigmodon minor	species	51554		Sigmodon minor	species	51554	Irvingtonian		1.8	0.3	2725
196332	occ			20186	Equus sp.	genus	42996		Equus	genus	42996	Irvingtonian		1.8	0.3	2725
196333	occ	9240		20187	Megalonyx sp.	genus	43603		Megalonyx	genus	43603	Irvingtonian		1.8	0.3	6294
196334	occ			20187	Sylvilagus sp.	genus	42193		Sylvilagus	genus	42193	Irvingtonian		1.8	0.3	2893
196335	occ	9241		20187	Archaeolaginae indet.	subfamily	104807		Archaeolaginae	subfamily	104807	Irvingtonian		1.8	0.3	6294
196336	occ			20187	Leporidae indet.	family	42163		Leporidae	family	42163	Irvingtonian		1.8	0.3	2893
196337	occ	9242		20187	Spermophilus aff. beecheyi	species	51683		Spermophilus beecheyi	species	44281	Irvingtonian		1.8	0.3	6294
196338	occ	9243		20187	cf. Neotamias sp.	genus	49088		Neotamias	genus	49088	Irvingtonian		1.8	0.3	6294
196339	occ			20187	Sciuridae indet.	family	41486		Sciuridae	family	41486	Irvingtonian		1.8	0.3	2893
196340	occ			20187	Geomys sp.	genus	41654		Geomys	genus	41654	Irvingtonian		1.8	0.3	2725
196341	occ	9244		20187	Thomomys bottae	species	52275		Thomomys bottae	species	49453	Irvingtonian		1.8	0.3	6294
196342	occ			20187	Perognathinae indet.	subfamily	370355		Perognathinae	subfamily	370355	Irvingtonian		1.8	0.3	2893
196343	occ			20187	Prodipodomys sp.	genus	41689		Prodipodomys	genus	41689	Irvingtonian		1.8	0.3	2893
196344	occ			20187	Dipodomys sp.	genus	41678		Dipodomys	genus	41678	Irvingtonian		1.8	0.3	2893
196345	occ			20187	Reithrodontomys sp.	genus	41869		Reithrodontomys	genus	41869	Irvingtonian		1.8	0.3	2893
196346	occ			20187	Sigmodon minor	species	51554		Sigmodon minor	species	51554	Irvingtonian		1.8	0.3	2893
196347	occ			20187	Sigmodon sp.	genus	41876		Sigmodon	genus	41876	Irvingtonian		1.8	0.3	2893
196348	occ			20187	Neotoma (Neotoma) sp.	subgenus	41822	obsolete variant of	Neotoma	genus	41822	Irvingtonian		1.8	0.3	2893
196349	occ	9245		20187	Ophiomys parvus	species	49364		Ophiomys parvus	species	48635	Irvingtonian		1.8	0.3	6294
196350	occ	9246		20187	Erethizon sp.	genus	42139		Erethizon	genus	42139	Irvingtonian		1.8	0.3	6294
196351	occ			20187	Canis cf. latrans	species	44854		Canis latrans	species	44854	Irvingtonian		1.8	0.3	2893
196352	occ	9247		20187	Mustela sp.	genus	41139		Mustela	genus	41139	Irvingtonian		1.8	0.3	6294
196353	occ	9248		20187	Equus scotti	species	46305		Equus scotti	species	46305	Irvingtonian		1.8	0.3	6294
196354	occ			20187	Platygonus bicalcaratus	species	50406	nomen dubium	Platygonus	genus	42437	Irvingtonian		1.8	0.3	2893
196355	occ	9249		20187	Camelidae indet.	family	42513		Camelidae	family	42513	Irvingtonian		1.8	0.3	6294
196356	occ			20187	Tetrameryx ? sp.	genus	42740		Tetrameryx	genus	42740	Irvingtonian		1.8	0.3	2725
196357	occ			20187	Antilocapra sp.	genus	42721		Antilocapra	genus	42721	Irvingtonian		1.8	0.3	2725
196358	occ			20187	Odocoileus sp.	genus	42682		Odocoileus	genus	42682	Irvingtonian		1.8	0.3	2725
196359	occ			20188	Leporidae indet.	family	42163		Leporidae	family	42163	Irvingtonian		1.8	0.3	2893
196360	occ			20188	Thomomys sp.	genus	41671		Thomomys	genus	41671	Irvingtonian		1.8	0.3	2893
196361	occ	9250		20188	Ophiomys parvus	species	49364		Ophiomys parvus	species	48635	Irvingtonian		1.8	0.3	6294
196362	occ			20189	Leporidae indet.	family	42163		Leporidae	family	42163	Irvingtonian		1.8	0.3	2893
196363	occ			20189	Thomomys sp.	genus	41671		Thomomys	genus	41671	Irvingtonian		1.8	0.3	2893
196364	occ			20189	Prodipodomys sp.	genus	41689		Prodipodomys	genus	41689	Irvingtonian		1.8	0.3	2893
196365	occ			20189	Dipodomys sp.	genus	41678		Dipodomys	genus	41678	Irvingtonian		1.8	0.3	2893
196366	occ			20189	Peromyscus sp.	genus	41837		Peromyscus	genus	41837	Irvingtonian		1.8	0.3	2893
196367	occ			20189	Sigmodon sp.	genus	41876		Sigmodon	genus	41876	Irvingtonian		1.8	0.3	2893
196368	occ			20190	Leporidae indet.	family	42163		Leporidae	family	42163	Irvingtonian		1.8	0.3	2893
196369	occ			20190	Neotoma sp.	genus	41822		Neotoma	genus	41822	Irvingtonian		1.8	0.3	2893
196370	occ			20191	Sorex sp.	genus	40486		Sorex	genus	40486	Irvingtonian		1.8	0.3	2725
196371	occ			20191	Hypolagus sp.	genus	42173		Hypolagus	genus	42173	Irvingtonian		1.8	0.3	2725
196372	occ			20191	Sylvilagus sp.	genus	42193		Sylvilagus	genus	42193	Irvingtonian		1.8	0.3	2725
196373	occ	9251		20191	Neotamias sp.	genus	49088		Neotamias	genus	49088	Irvingtonian		1.8	0.3	6294
196374	occ			20191	Thomomys bottae	species	52275		Thomomys bottae	species	49453	Irvingtonian		1.8	0.3	2725
196375	occ			20191	Dipodomys sp.	genus	41678		Dipodomys	genus	41678	Irvingtonian		1.8	0.3	2725
196376	occ			20191	Neotoma sp.	genus	41822		Neotoma	genus	41822	Irvingtonian		1.8	0.3	2725
196377	occ			20191	Sigmodon minor	species	51554		Sigmodon minor	species	51554	Irvingtonian		1.8	0.3	2725
196378	occ			20191	cf. Canidae indet.	family	41189		Canidae	family	41189	Irvingtonian		1.8	0.3	2725
196379	occ			20192	cf. Scapanus sp.	genus	40425		Scapanus	genus	40425	Irvingtonian		1.8	0.3	2725
196380	occ			20192	Leporidae indet.	family	42163		Leporidae	family	42163	Irvingtonian		1.8	0.3	2725
196381	occ			20192	cf. Dipodomys sp.	genus	41678		Dipodomys	genus	41678	Irvingtonian		1.8	0.3	2725
196382	occ			20192	Peromyscus sp.	genus	41837		Peromyscus	genus	41837	Irvingtonian		1.8	0.3	2725
196383	occ			20192	cf. Sigmodon sp.	genus	41876		Sigmodon	genus	41876	Irvingtonian		1.8	0.3	2725
196384	occ			20192	Equus ? sp.	genus	42996		Equus	genus	42996	Irvingtonian		1.8	0.3	2725
196385	occ	9252		20193	Equus cf. scotti	species	46305		Equus scotti	species	46305	Irvingtonian		1.8	0.3	6294
196386	occ			20194	Equus sp.	genus	42996		Equus	genus	42996	Irvingtonian		1.8	0.3	2725
196387	occ			20195	Leporidae indet.	family	42163		Leporidae	family	42163	Irvingtonian		1.8	0.3	2893
196388	occ			20195	Thomomys sp.	genus	41671		Thomomys	genus	41671	Irvingtonian		1.8	0.3	2893
196389	occ			20195	Dipodomys sp.	genus	41678		Dipodomys	genus	41678	Irvingtonian		1.8	0.3	2893
196390	occ			20195	Reithrodontomys sp.	genus	41869		Reithrodontomys	genus	41869	Irvingtonian		1.8	0.3	2893
196391	occ			20195	Equus sp.	genus	42996		Equus	genus	42996	Irvingtonian		1.8	0.3	2893
196392	occ			20196	Thomomys sp.	genus	41671		Thomomys	genus	41671	Irvingtonian		1.8	0.3	2725
196393	occ			20196	Cricetidae indet.	family	41724		Cricetidae	family	41724	Irvingtonian		1.8	0.3	2725
196394	occ			20197	Equus sp.	genus	42996		Equus	genus	42996	Irvingtonian		1.8	0.3	2725
196395	occ			20198	Equus sp.	genus	42996		Equus	genus	42996	Irvingtonian		1.8	0.3	2725
196396	occ			20199	Leporidae indet.	family	42163		Leporidae	family	42163	Irvingtonian		1.8	0.3	2893
196397	occ	9253		20199	Thomomys bottae	species	52275		Thomomys bottae	species	49453	Irvingtonian		1.8	0.3	6294
196398	occ			20199	Sigmodon sp.	genus	41876		Sigmodon	genus	41876	Irvingtonian		1.8	0.3	2893
196399	occ	9254		20199	Ophiomys parvus	species	49364		Ophiomys parvus	species	48635	Irvingtonian		1.8	0.3	6294
196400	occ			20199	Odocoileus sp.	genus	42682		Odocoileus	genus	42682	Irvingtonian		1.8	0.3	2725
196401	occ			20200	Sylvilagus sp.	genus	42193		Sylvilagus	genus	42193	Irvingtonian		1.8	0.3	2725
196402	occ			20200	Leporidae indet.	family	42163		Leporidae	family	42163	Irvingtonian		1.8	0.3	2725
196403	occ			20200	Thomomys cf. bottae	species	52275		Thomomys bottae	species	49453	Irvingtonian		1.8	0.3	2725
196404	occ	9255		20200	Perognathinae indet.	subfamily	370355		Perognathinae	subfamily	370355	Irvingtonian		1.8	0.3	6294
196405	occ			20200	Dipodomys sp.	genus	41678		Dipodomys	genus	41678	Irvingtonian		1.8	0.3	2725
196406	occ			20200	Peromyscus sp.	genus	41837		Peromyscus	genus	41837	Irvingtonian		1.8	0.3	2725
196407	occ			20200	Microtus californicus	species	48573		Microtus californicus	species	44333	Irvingtonian		1.8	0.3	2725
196408	occ			20200	Mammut sp.	genus	43274		Mammut	genus	43274	Irvingtonian		1.8	0.3	2725
196409	occ	9256		20200	Equus cf. scotti	species	46305		Equus scotti	species	46305	Irvingtonian		1.8	0.3	6294
196410	occ			20201	Leporidae indet.	family	42163		Leporidae	family	42163	Irvingtonian		1.8	0.3	2725
196411	occ			20201	Mammuthus sp.	genus	43266		Mammuthus	genus	43266	Irvingtonian		1.8	0.3	2725
196412	occ			20202	Equus sp.	genus	42996		Equus	genus	42996	Irvingtonian		1.8	0.3	2725
196413	occ			20203	Leporidae indet.	family	42163		Leporidae	family	42163	Irvingtonian		1.8	0.3	2725
196414	occ			20204	Equus sp.	genus	42996		Equus	genus	42996	Irvingtonian		1.8	0.3	2725
196415	occ			20205	Scapanus sp.	genus	40425		Scapanus	genus	40425	Irvingtonian		1.8	0.3	2725
196416	occ			20205	Sylvilagus sp.	genus	42193		Sylvilagus	genus	42193	Irvingtonian		1.8	0.3	2725
196417	occ			20205	Leporidae indet.	family	42163		Leporidae	family	42163	Irvingtonian		1.8	0.3	2725
196418	occ			20205	Sciuridae indet.	family	41486		Sciuridae	family	41486	Irvingtonian		1.8	0.3	2725
196419	occ			20205	Thomomys bottae	species	52275		Thomomys bottae	species	49453	Irvingtonian		1.8	0.3	2725
196420	occ	9257		20205	Perognathinae indet.	subfamily	370355		Perognathinae	subfamily	370355	Irvingtonian		1.8	0.3	6294
196421	occ			20205	Dipodomys sp.	genus	41678		Dipodomys	genus	41678	Irvingtonian		1.8	0.3	2725
196422	occ			20205	Neotoma sp.	genus	41822		Neotoma	genus	41822	Irvingtonian		1.8	0.3	2725
196423	occ			20205	Terricola meadensis	species	52184	recombined as	Microtus meadensis	species	50378	Irvingtonian		1.8	0.3	1055
196424	occ			20205	Canis sp.	genus	41198		Canis	genus	41198	Irvingtonian		1.8	0.3	2725
196425	occ			20205	Felidae indet.	family	41045		Felidae	family	41045	Irvingtonian		1.8	0.3	2725
196426	occ			20205	cf. Mammuthus sp.	genus	43266		Mammuthus	genus	43266	Irvingtonian		1.8	0.3	2725
196427	occ	9258		20205	Equus scotti	species	46305		Equus scotti	species	46305	Irvingtonian		1.8	0.3	6294
196428	occ			20205	Camelidae indet.	family	42513		Camelidae	family	42513	Irvingtonian		1.8	0.3	2725
196429	occ			20206	Scapanus sp.	genus	40425		Scapanus	genus	40425	Irvingtonian		1.8	0.3	2725
196430	occ			20206	Leporidae indet.	family	42163		Leporidae	family	42163	Irvingtonian		1.8	0.3	2725
196431	occ			20206	Sciuridae indet.	family	41486		Sciuridae	family	41486	Irvingtonian		1.8	0.3	2725
196432	occ			20206	Thomomys bottae	species	52275		Thomomys bottae	species	49453	Irvingtonian		1.8	0.3	2725
196433	occ	9259		20206	Perognathinae indet.	subfamily	370355		Perognathinae	subfamily	370355	Irvingtonian		1.8	0.3	6294
196434	occ			20206	Dipodomys sp.	genus	41678		Dipodomys	genus	41678	Irvingtonian		1.8	0.3	2725
196435	occ			20206	Peromyscus sp.	genus	41837		Peromyscus	genus	41837	Irvingtonian		1.8	0.3	2725
196436	occ			20206	Neotoma sp.	genus	41822		Neotoma	genus	41822	Irvingtonian		1.8	0.3	2725
196437	occ			20206	Microtus sp.	genus	41810		Microtus	genus	41810	Irvingtonian		1.8	0.3	2725
196438	occ			20206	Vulpes sp.	genus	41248		Vulpes	genus	41248	Irvingtonian		1.8	0.3	2725
196439	occ			20206	Arctodus simus	species	44277		Arctodus simus	species	44309	Irvingtonian		1.8	0.3	2725
196440	occ			20206	Mammuthus sp.	genus	43266		Mammuthus	genus	43266	Irvingtonian		1.8	0.3	2725
196441	occ	9260		20206	Equus scotti	species	46305		Equus scotti	species	46305	Irvingtonian		1.8	0.3	6294
196442	occ			20206	Camelops sp.	genus	42520		Camelops	genus	42520	Irvingtonian		1.8	0.3	2725
196443	occ			20206	Hemiauchenia sp.	genus	42528		Hemiauchenia	genus	42528	Irvingtonian		1.8	0.3	2725
196444	occ			20206	Tetrameryx ? sp.	genus	42740		Tetrameryx	genus	42740	Irvingtonian		1.8	0.3	2725
196445	occ			20207	Leporidae indet.	family	42163		Leporidae	family	42163	Irvingtonian		1.8	0.3	2725
196446	occ			20207	Thomomys bottae	species	52275		Thomomys bottae	species	49453	Irvingtonian		1.8	0.3	2725
196447	occ	9261		20207	Perognathinae indet.	subfamily	370355		Perognathinae	subfamily	370355	Irvingtonian		1.8	0.3	6294
196448	occ			20207	Dipodomys sp.	genus	41678		Dipodomys	genus	41678	Irvingtonian		1.8	0.3	2725
196449	occ			20207	Neotoma sp.	genus	41822		Neotoma	genus	41822	Irvingtonian		1.8	0.3	2725
196450	occ			20207	Microtus sp.	genus	41810		Microtus	genus	41810	Irvingtonian		1.8	0.3	2725
196451	occ			20207	Canidae indet.	family	41189		Canidae	family	41189	Irvingtonian		1.8	0.3	2725
196452	occ	9262		20207	Equus scotti	species	46305		Equus scotti	species	46305	Irvingtonian		1.8	0.3	6294
196453	occ			20207	Camelidae indet.	family	42513		Camelidae	family	42513	Irvingtonian		1.8	0.3	2725
196454	occ			20208	Leporidae indet.	family	42163		Leporidae	family	42163	Irvingtonian		1.8	0.3	2725
196455	occ			20208	Thomomys sp.	genus	41671		Thomomys	genus	41671	Irvingtonian		1.8	0.3	2725
196456	occ			20209	Hypolagus sp.	genus	42173		Hypolagus	genus	42173	Irvingtonian		1.8	0.3	2725
196457	occ			20209	Thomomys bottae	species	52275		Thomomys bottae	species	49453	Irvingtonian		1.8	0.3	2725
196458	occ	9263		20209	Perognathinae indet.	subfamily	370355		Perognathinae	subfamily	370355	Irvingtonian		1.8	0.3	6294
196459	occ			20209	Dipodomys sp.	genus	41678		Dipodomys	genus	41678	Irvingtonian		1.8	0.3	2725
196460	occ			20209	Peromyscus sp.	genus	41837		Peromyscus	genus	41837	Irvingtonian		1.8	0.3	2725
196461	occ			20209	Canidae indet.	family	41189		Canidae	family	41189	Irvingtonian		1.8	0.3	2725
196462	occ			20210	Leporidae indet.	family	42163		Leporidae	family	42163	Irvingtonian		1.8	0.3	2725
196463	occ			20210	Thomomys bottae	species	52275		Thomomys bottae	species	49453	Irvingtonian		1.8	0.3	2725
196464	occ	9264		20210	Perognathinae indet.	subfamily	370355		Perognathinae	subfamily	370355	Irvingtonian		1.8	0.3	6294
196465	occ			20210	Dipodomys sp.	genus	41678		Dipodomys	genus	41678	Irvingtonian		1.8	0.3	2725
196466	occ			20210	Peromyscus sp.	genus	41837		Peromyscus	genus	41837	Irvingtonian		1.8	0.3	2725
196467	occ			20210	Equus sp.	genus	42996		Equus	genus	42996	Irvingtonian		1.8	0.3	2725
196468	occ			20211	Leporidae indet.	family	42163		Leporidae	family	42163	Irvingtonian		1.8	0.3	2725
196469	occ			20211	Sciuridae indet.	family	41486		Sciuridae	family	41486	Irvingtonian		1.8	0.3	2725
196470	occ			20211	Thomomys bottae	species	52275		Thomomys bottae	species	49453	Irvingtonian		1.8	0.3	2725
196471	occ	9265		20211	Perognathinae indet.	subfamily	370355		Perognathinae	subfamily	370355	Irvingtonian		1.8	0.3	6294
196472	occ			20211	Dipodomys sp.	genus	41678		Dipodomys	genus	41678	Irvingtonian		1.8	0.3	2725
196473	occ			20211	Neotoma sp.	genus	41822		Neotoma	genus	41822	Irvingtonian		1.8	0.3	2725
196474	occ			20211	Microtus sp.	genus	41810		Microtus	genus	41810	Irvingtonian		1.8	0.3	2725
196475	occ			20211	Equus sp.	genus	42996		Equus	genus	42996	Irvingtonian		1.8	0.3	2725
196476	occ			20212	Leporidae indet.	family	42163		Leporidae	family	42163	Irvingtonian		1.8	0.3	2725
196477	occ			20212	Thomomys bottae	species	52275		Thomomys bottae	species	49453	Irvingtonian		1.8	0.3	2725
196478	occ	9266		20212	Perognathinae indet.	subfamily	370355		Perognathinae	subfamily	370355	Irvingtonian		1.8	0.3	6294
196479	occ			20212	Dipodomys sp.	genus	41678		Dipodomys	genus	41678	Irvingtonian		1.8	0.3	2725
196480	occ			20212	Peromyscus sp.	genus	41837		Peromyscus	genus	41837	Irvingtonian		1.8	0.3	2725
196481	occ			20212	Microtus sp.	genus	41810		Microtus	genus	41810	Irvingtonian		1.8	0.3	2725
196482	occ			20213	Thomomys sp.	genus	41671		Thomomys	genus	41671	Irvingtonian		1.8	0.3	2725
196483	occ	9267		20213	Perognathinae indet.	subfamily	370355		Perognathinae	subfamily	370355	Irvingtonian		1.8	0.3	6294
196484	occ			20214	Sorex sp.	genus	40486		Sorex	genus	40486	Irvingtonian		1.8	0.3	2725
196485	occ			20214	Sylvilagus sp.	genus	42193		Sylvilagus	genus	42193	Irvingtonian		1.8	0.3	2725
196486	occ			20214	Lepus sp.	genus	42176		Lepus	genus	42176	Irvingtonian		1.8	0.3	2725
196487	occ			20214	Sciuridae indet.	family	41486		Sciuridae	family	41486	Irvingtonian		1.8	0.3	2725
196488	occ			20214	Thomomys bottae	species	52275		Thomomys bottae	species	49453	Irvingtonian		1.8	0.3	2725
196489	occ	9268		20214	Perognathinae indet.	subfamily	370355		Perognathinae	subfamily	370355	Irvingtonian		1.8	0.3	6294
196490	occ			20214	Dipodomys sp.	genus	41678		Dipodomys	genus	41678	Irvingtonian		1.8	0.3	2725
196491	occ			20214	Peromyscus sp.	genus	41837		Peromyscus	genus	41837	Irvingtonian		1.8	0.3	2725
196492	occ			20214	Onychomys torridus	species	49354		Onychomys torridus	species	46935	Irvingtonian		1.8	0.3	2725
196493	occ			20214	Neotoma sp.	genus	41822		Neotoma	genus	41822	Irvingtonian		1.8	0.3	2725
196494	occ			20214	Microtus sp.	genus	41810		Microtus	genus	41810	Irvingtonian		1.8	0.3	2725
196495	occ			20214	Taxidea sp.	genus	41175		Taxidea	genus	41175	Irvingtonian		1.8	0.3	2725
196496	occ			20214	cf. Mammuthus sp.	genus	43266		Mammuthus	genus	43266	Irvingtonian		1.8	0.3	2725
196497	occ			20215	Neotoma sp.	genus	41822		Neotoma	genus	41822	Irvingtonian		1.8	0.3	2725
196498	occ			20216	Dipodomys sp.	genus	41678		Dipodomys	genus	41678	Irvingtonian		1.8	0.3	2725
196499	occ			20216	Neotoma sp.	genus	41822		Neotoma	genus	41822	Irvingtonian		1.8	0.3	2725
196500	occ	9269		20216	Equus scotti	species	46305		Equus scotti	species	46305	Irvingtonian		1.8	0.3	6294
196501	occ			20216	Camelidae indet.	family	42513		Camelidae	family	42513	Irvingtonian		1.8	0.3	2725
196502	occ			20217	Equus sp.	genus	42996		Equus	genus	42996	Irvingtonian		1.8	0.3	2725
196503	occ			20218	Scapanus ? sp.	genus	40425		Scapanus	genus	40425	Irvingtonian		1.8	0.3	2725
196504	occ			20218	Leporidae indet.	family	42163		Leporidae	family	42163	Irvingtonian		1.8	0.3	2725
196505	occ			20218	Neotoma sp.	genus	41822		Neotoma	genus	41822	Irvingtonian		1.8	0.3	2725
196506	occ			20218	Microtus sp.	genus	41810		Microtus	genus	41810	Irvingtonian		1.8	0.3	2725
196507	occ			20218	Equus sp.	genus	42996		Equus	genus	42996	Irvingtonian		1.8	0.3	2725
196508	occ			20218	Camelidae indet.	family	42513		Camelidae	family	42513	Irvingtonian		1.8	0.3	2725
196509	occ	9270		20219	Equus scotti	species	46305		Equus scotti	species	46305	Irvingtonian		1.8	0.3	6294
196510	occ			20220	Leporidae indet.	family	42163		Leporidae	family	42163	Irvingtonian		1.8	0.3	2725
196511	occ			20220	Thomomys sp.	genus	41671		Thomomys	genus	41671	Irvingtonian		1.8	0.3	2725
196512	occ			20220	Dipodomys sp.	genus	41678		Dipodomys	genus	41678	Irvingtonian		1.8	0.3	2725
196513	occ			20220	Equus sp.	genus	42996		Equus	genus	42996	Irvingtonian		1.8	0.3	2725
196514	occ			20221	Neotoma sp.	genus	41822		Neotoma	genus	41822	Irvingtonian		1.8	0.3	2725
196515	occ			20221	Equus sp.	genus	42996		Equus	genus	42996	Irvingtonian		1.8	0.3	2725
196516	occ	9271		20222	Equus scotti	species	46305		Equus scotti	species	46305	Irvingtonian		1.8	0.3	6294
196517	occ			20223	Dipodomys sp.	genus	41678		Dipodomys	genus	41678	Irvingtonian		1.8	0.3	2725
196518	occ			20224	Equus sp.	genus	42996		Equus	genus	42996	Irvingtonian		1.8	0.3	2725
196519	occ			20225	Equus sp.	genus	42996		Equus	genus	42996	Irvingtonian		1.8	0.3	2725
196520	occ	9272		20226	Equus cf. scotti	species	46305		Equus scotti	species	46305	Irvingtonian		1.8	0.3	6294
196521	occ			20227	Equus sp.	genus	42996		Equus	genus	42996	Irvingtonian		1.8	0.3	2725
196522	occ			20227	cf. Antilocapra sp.	genus	42721		Antilocapra	genus	42721	Irvingtonian		1.8	0.3	2725
196523	occ			20228	Sylvilagus sp.	genus	42193		Sylvilagus	genus	42193	Irvingtonian		1.8	0.3	2725
196524	occ			20228	Thomomys sp.	genus	41671		Thomomys	genus	41671	Irvingtonian		1.8	0.3	2725
196525	occ			20228	Perognathinae indet.	subfamily	370355		Perognathinae	subfamily	370355	Irvingtonian		1.8	0.3	2725
196526	occ			20229	Equus sp.	genus	42996		Equus	genus	42996	Irvingtonian		1.8	0.3	2725
196527	occ			20230	cf. Leporidae indet.	family	42163		Leporidae	family	42163	Irvingtonian		1.8	0.3	2725
196528	occ			20230	Thomomys bottae	species	52275		Thomomys bottae	species	49453	Irvingtonian		1.8	0.3	2725
196529	occ	9273		20230	Perognathinae indet.	subfamily	370355		Perognathinae	subfamily	370355	Irvingtonian		1.8	0.3	6294
196530	occ			20230	Dipodomys sp.	genus	41678		Dipodomys	genus	41678	Irvingtonian		1.8	0.3	2725
196531	occ			20230	Neotoma ? sp.	genus	41822		Neotoma	genus	41822	Irvingtonian		1.8	0.3	2725
196532	occ			20231	Thomomys bottae	species	52275		Thomomys bottae	species	49453	Irvingtonian		1.8	0.3	2725
196533	occ			20232	Thomomys sp.	genus	41671		Thomomys	genus	41671	Irvingtonian		1.8	0.3	2725
196534	occ			20232	Dipodomys sp.	genus	41678		Dipodomys	genus	41678	Irvingtonian		1.8	0.3	2725
196535	occ			20232	Neotoma ? sp.	genus	41822		Neotoma	genus	41822	Irvingtonian		1.8	0.3	2725
196536	occ			20233	Leporidae indet.	family	42163		Leporidae	family	42163	Irvingtonian		1.8	0.3	2725
196537	occ			20233	Thomomys sp.	genus	41671		Thomomys	genus	41671	Irvingtonian		1.8	0.3	2725
196538	occ			20233	Dipodomys sp.	genus	41678		Dipodomys	genus	41678	Irvingtonian		1.8	0.3	2725
196539	occ			20233	Peromyscus sp.	genus	41837		Peromyscus	genus	41837	Irvingtonian		1.8	0.3	2725
196540	occ			20233	Neotoma sp.	genus	41822		Neotoma	genus	41822	Irvingtonian		1.8	0.3	2725
196541	occ			20233	Microtus sp.	genus	41810		Microtus	genus	41810	Irvingtonian		1.8	0.3	2725
196542	occ	9274		20233	Equus cf. scotti	species	46305		Equus scotti	species	46305	Irvingtonian		1.8	0.3	6294
196543	occ			20234	Thomomys bottae	species	52275		Thomomys bottae	species	49453	Irvingtonian		1.8	0.3	2725
196544	occ			20234	Dipodomys sp.	genus	41678		Dipodomys	genus	41678	Irvingtonian		1.8	0.3	2725
196545	occ			20234	Neotoma sp.	genus	41822		Neotoma	genus	41822	Irvingtonian		1.8	0.3	2725
196546	occ	9275		20235	Equus scotti	species	46305		Equus scotti	species	46305	Irvingtonian		1.8	0.3	6294
196547	occ			20236	Equus sp.	genus	42996		Equus	genus	42996	Irvingtonian		1.8	0.3	2725
196548	occ			20237	Thomomys bottae	species	52275		Thomomys bottae	species	49453	Irvingtonian		1.8	0.3	2725
196549	occ			20237	Canis sp.	genus	41198		Canis	genus	41198	Irvingtonian		1.8	0.3	2725
196550	occ			20237	Equus sp.	genus	42996		Equus	genus	42996	Irvingtonian		1.8	0.3	2725
196551	occ			20238	Thomomys sp.	genus	41671		Thomomys	genus	41671	Irvingtonian		1.8	0.3	2725
196552	occ			20238	Proboscidea indet.	order	43230		Proboscidea	order	43230	Irvingtonian		1.8	0.3	2725
196553	occ			20239	Equus sp.	genus	42996		Equus	genus	42996	Irvingtonian		1.8	0.3	2725
196554	occ			20239	Camelops sp.	genus	42520		Camelops	genus	42520	Irvingtonian		1.8	0.3	2725
196555	occ			20239	Hemiauchenia ? sp.	genus	42528		Hemiauchenia	genus	42528	Irvingtonian		1.8	0.3	2725
196556	occ			20240	Leporidae indet.	family	42163		Leporidae	family	42163	Irvingtonian		1.8	0.3	2725
196557	occ			20240	Thomomys sp.	genus	41671		Thomomys	genus	41671	Irvingtonian		1.8	0.3	2725
196558	occ	9276		20240	Perognathinae indet.	subfamily	370355		Perognathinae	subfamily	370355	Irvingtonian		1.8	0.3	6294
196559	occ			20240	Peromyscus sp.	genus	41837		Peromyscus	genus	41837	Irvingtonian		1.8	0.3	2725
196560	occ			20240	Sigmodon sp.	genus	41876		Sigmodon	genus	41876	Irvingtonian		1.8	0.3	2725
196561	occ			20241	Soricidae indet.	family	40443		Soricidae	family	40443	Irvingtonian		1.8	0.3	2725
196562	occ			20241	Leporidae indet.	family	42163		Leporidae	family	42163	Irvingtonian		1.8	0.3	2725
196563	occ	9277		20241	cf. Neotamias sp.	genus	49088		Neotamias	genus	49088	Irvingtonian		1.8	0.3	6294
196564	occ			20241	Thomomys sp.	genus	41671		Thomomys	genus	41671	Irvingtonian		1.8	0.3	2725
196565	occ	9278		20241	Perognathinae indet.	subfamily	370355		Perognathinae	subfamily	370355	Irvingtonian		1.8	0.3	6294
196566	occ			20241	Prodipodomys ? sp.	genus	41689		Prodipodomys	genus	41689	Irvingtonian		1.8	0.3	2725
196567	occ			20241	Peromyscus sp.	genus	41837		Peromyscus	genus	41837	Irvingtonian		1.8	0.3	2725
196568	occ			20241	Sigmodon sp.	genus	41876		Sigmodon	genus	41876	Irvingtonian		1.8	0.3	2725
196569	occ	9279		20241	Arvicolinae indet.	subfamily	67892		Arvicolinae	subfamily	67892	Irvingtonian		1.8	0.3	6294
196570	occ			20242	Thomomys sp.	genus	41671		Thomomys	genus	41671	Irvingtonian		1.8	0.3	2725
196571	occ			20243	Thomomys sp.	genus	41671		Thomomys	genus	41671	Irvingtonian		1.8	0.3	2725
196572	occ			20244	Sylvilagus sp.	genus	42193		Sylvilagus	genus	42193	Irvingtonian		1.8	0.3	2725
196573	occ			20244	Lepus sp.	genus	42176		Lepus	genus	42176	Irvingtonian		1.8	0.3	2725
196574	occ			20244	Sciuridae indet.	family	41486		Sciuridae	family	41486	Irvingtonian		1.8	0.3	2725
196575	occ			20244	Thomomys sp.	genus	41671		Thomomys	genus	41671	Irvingtonian		1.8	0.3	2725
196576	occ			20244	Dipodomys sp.	genus	41678		Dipodomys	genus	41678	Irvingtonian		1.8	0.3	2725
196577	occ			20244	Microtus californicus	species	48573		Microtus californicus	species	44333	Irvingtonian		1.8	0.3	2725
196578	occ			20244	Equus sp.	genus	42996		Equus	genus	42996	Irvingtonian		1.8	0.3	2725
196579	occ			20245	Lepus sp.	genus	42176		Lepus	genus	42176	Irvingtonian		1.8	0.3	2725
196580	occ			20245	Thomomys sp.	genus	41671		Thomomys	genus	41671	Irvingtonian		1.8	0.3	2725
196581	occ			20245	Dipodomys sp.	genus	41678		Dipodomys	genus	41678	Irvingtonian		1.8	0.3	2725
196582	occ			20245	cf. Equus sp.	genus	42996		Equus	genus	42996	Irvingtonian		1.8	0.3	2725
196583	occ			20246	Sylvilagus sp.	genus	42193		Sylvilagus	genus	42193	Irvingtonian		1.8	0.3	2725
196584	occ			20246	Thomomys bottae	species	52275		Thomomys bottae	species	49453	Irvingtonian		1.8	0.3	2725
196585	occ			20246	Peromyscus sp.	genus	41837		Peromyscus	genus	41837	Irvingtonian		1.8	0.3	2725
196586	occ			20246	Neotoma sp.	genus	41822		Neotoma	genus	41822	Irvingtonian		1.8	0.3	2725
196587	occ			20247	Sylvilagus sp.	genus	42193		Sylvilagus	genus	42193	Irvingtonian		1.8	0.3	2725
196588	occ			20247	Thomomys sp.	genus	41671		Thomomys	genus	41671	Irvingtonian		1.8	0.3	2725
196589	occ	9280		20247	Perognathinae indet.	subfamily	370355		Perognathinae	subfamily	370355	Irvingtonian		1.8	0.3	6294
196590	occ			20247	Neotoma sp.	genus	41822		Neotoma	genus	41822	Irvingtonian		1.8	0.3	2725
196591	occ			20248	Sylvilagus sp.	genus	42193		Sylvilagus	genus	42193	Irvingtonian		1.8	0.3	2725
196592	occ			20248	Lepus sp.	genus	42176		Lepus	genus	42176	Irvingtonian		1.8	0.3	2725
196593	occ			20248	Thomomys sp.	genus	41671		Thomomys	genus	41671	Irvingtonian		1.8	0.3	2725
196594	occ			20248	Dipodomys sp.	genus	41678		Dipodomys	genus	41678	Irvingtonian		1.8	0.3	2725
196595	occ			20248	Peromyscus sp.	genus	41837		Peromyscus	genus	41837	Irvingtonian		1.8	0.3	2725
196596	occ			20248	Neotoma sp.	genus	41822		Neotoma	genus	41822	Irvingtonian		1.8	0.3	2725
196597	occ			20248	Microtus californicus	species	48573		Microtus californicus	species	44333	Irvingtonian		1.8	0.3	2725
196598	occ			20248	Equus ? sp.	genus	42996		Equus	genus	42996	Irvingtonian		1.8	0.3	2725
196599	occ			20249	Dipodomys sp.	genus	41678		Dipodomys	genus	41678	Irvingtonian		1.8	0.3	2725
196600	occ			20250	Microtus sp.	genus	41810		Microtus	genus	41810	Irvingtonian		1.8	0.3	2725
196601	occ			20251	Thomomys sp.	genus	41671		Thomomys	genus	41671	Irvingtonian		1.8	0.3	2725
196602	occ			20251	Dipodomys sp.	genus	41678		Dipodomys	genus	41678	Irvingtonian		1.8	0.3	2725
196603	occ			20252	cf. Mammut sp.	genus	43274		Mammut	genus	43274	Irvingtonian		1.8	0.3	2725
196604	occ			20253	Equus sp.	genus	42996		Equus	genus	42996	Irvingtonian		1.8	0.3	2725
196605	occ	9281		20254	Equus cf. scotti	species	46305		Equus scotti	species	46305	Irvingtonian		1.8	0.3	6294
196606	occ	9282		20255	Equus cf. scotti	species	46305		Equus scotti	species	46305	Irvingtonian		1.8	0.3	6294
196607	occ			20256	Antilocapridae indet.	family	42720		Antilocapridae	family	42720	Irvingtonian		1.8	0.3	2725
196608	occ			20257	Mammut sp.	genus	43274		Mammut	genus	43274	Irvingtonian		1.8	0.3	2725
196609	occ	9283		20257	Equus cf. scotti	species	46305		Equus scotti	species	46305	Irvingtonian		1.8	0.3	6294
196610	occ			20258	Odocoileus sp.	genus	42682		Odocoileus	genus	42682	Irvingtonian		1.8	0.3	2725
196611	occ			20258	Cervidae indet.	family	42652		Cervidae	family	42652	Irvingtonian		1.8	0.3	2725
196612	occ			20258	Antilocapridae indet.	family	42720		Antilocapridae	family	42720	Irvingtonian		1.8	0.3	2725
196613	occ			20259	Paramylodon ? harlani	species	49881		Paramylodon harlani	species	48020	Irvingtonian		1.8	0.3	2725
196614	occ			20259	Proboscidea indet.	order	43230		Proboscidea	order	43230	Irvingtonian		1.8	0.3	2725
196615	occ			20260	Mammuthus sp.	genus	43266		Mammuthus	genus	43266	Irvingtonian		1.8	0.3	2725
196616	occ			20261	Paramylodon ? sp.	genus	43642		Paramylodon	genus	43642	Irvingtonian		1.8	0.3	2725
196617	occ			20261	Equus sp.	genus	42996		Equus	genus	42996	Irvingtonian		1.8	0.3	2725
196618	occ			20261	Camelidae indet.	family	42513		Camelidae	family	42513	Irvingtonian		1.8	0.3	2725
196619	occ	9284		20262	Equus scotti	species	46305		Equus scotti	species	46305	Irvingtonian		1.8	0.3	6294
196620	occ	9285		20263	Equus cf. scotti	species	46305		Equus scotti	species	46305	Irvingtonian		1.8	0.3	6294
196621	occ			20264	Equus sp.	genus	42996		Equus	genus	42996	Irvingtonian		1.8	0.3	2725
196622	occ			20265	Equus sp.	genus	42996		Equus	genus	42996	Irvingtonian		1.8	0.3	2725
196623	occ			20266	Equus sp.	genus	42996		Equus	genus	42996	Irvingtonian		1.8	0.3	2725
196624	occ			20266	Hemiauchenia ? sp.	genus	42528		Hemiauchenia	genus	42528	Irvingtonian		1.8	0.3	2725
196625	occ			20267	Cervidae indet.	family	42652		Cervidae	family	42652	Irvingtonian		1.8	0.3	2725
196626	occ			20268	Mammuthus sp.	genus	43266		Mammuthus	genus	43266	Irvingtonian		1.8	0.3	2725
196627	occ	9286		20268	Equus cf. scotti	species	46305		Equus scotti	species	46305	Irvingtonian		1.8	0.3	6294
196628	occ			20268	Camelidae indet.	family	42513		Camelidae	family	42513	Irvingtonian		1.8	0.3	2725
196629	occ			20269	Equus sp.	genus	42996		Equus	genus	42996	Irvingtonian		1.8	0.3	2725
196630	occ	9287		20270	Equus cf. scotti	species	46305		Equus scotti	species	46305	Irvingtonian		1.8	0.3	6294
196631	occ			20271	Equus sp.	genus	42996		Equus	genus	42996	Irvingtonian		1.8	0.3	2725
196969	occ			20298	Sylvilagus sp.	genus	42193		Sylvilagus	genus	42193	Blancan	Irvingtonian	4.9	0.3	2725
196970	occ			20298	Leporidae indet.	family	42163		Leporidae	family	42163	Blancan	Irvingtonian	4.9	0.3	2725
196971	occ			20298	Thomomys cf. gidleyi	species	52277		Thomomys gidleyi	species	52277	Blancan	Irvingtonian	4.9	0.3	2725
196972	occ			20298	Dipodomys ? sp.	genus	41678		Dipodomys	genus	41678	Blancan	Irvingtonian	4.9	0.3	2725
196973	occ	9379		20298	Perognathinae indet.	subfamily	370355		Perognathinae	subfamily	370355	Blancan	Irvingtonian	4.9	0.3	6294
196974	occ			20298	Sigmodon minor	species	51554		Sigmodon minor	species	51554	Blancan	Irvingtonian	4.9	0.3	2725
196975	occ			20298	Ondatra sp.	genus	41826		Ondatra	genus	41826	Blancan	Irvingtonian	4.9	0.3	2725
196976	occ	9380		20298	Ophiomys parvus	species	49364		Ophiomys parvus	species	48635	Blancan	Irvingtonian	4.9	0.3	6294
196977	occ			20298	Equus sp.	genus	42996		Equus	genus	42996	Blancan	Irvingtonian	4.9	0.3	2725
197264	occ			20319	Leporidae indet.	family	42163		Leporidae	family	42163	Irvingtonian		1.8	0.3	2887
197265	occ			20319	Megalonyx sp.	genus	43603		Megalonyx	genus	43603	Irvingtonian		1.8	0.3	2887
197266	occ			20319	Arctodus sp.	genus	41308		Arctodus	genus	41308	Irvingtonian		1.8	0.3	2887
197267	occ			20319	Mustelidae indet.	family	41086		Mustelidae	family	41086	Irvingtonian		1.8	0.3	2887
197268	occ			20319	Canis edwardii	species	44838		Canis edwardii	species	44838	Irvingtonian		1.8	0.3	2887
197269	occ			20319	Camelops cf. hesternus	species	44801		Camelops hesternus	species	44383	Irvingtonian		1.8	0.3	2887
197270	occ	9439		20319	Odocoileus hemionus	species	49284	recombined as	Dama hemionus	species	45019	Irvingtonian		1.8	0.3	6294
197271	occ	9440		20319	Equus simplicidens	species	46308	recombined as	Plesippus simplicidens	species	46308	Irvingtonian		1.8	0.3	939
197272	occ	9441		20319	Tapirus cf. haysii	species	52063	recombined as	Tapirus (Helicotapirus) haysii	species	52063	Irvingtonian		1.8	0.3	6294
197273	occ			20319	Thomomys sp.	genus	41671		Thomomys	genus	41671	Irvingtonian		1.8	0.3	939
197274	occ			20319	Dipodomys sp.	genus	41678		Dipodomys	genus	41678	Irvingtonian		1.8	0.3	939
197275	occ			20319	Neotoma sp.	genus	41822		Neotoma	genus	41822	Irvingtonian		1.8	0.3	939
197276	occ	20822		20319	Arvicolinae indet.	subfamily	67892		Arvicolinae	subfamily	67892	Irvingtonian		1.8	0.3	27859
197277	occ			20319	Ondatra idahoensis	species	49335		Ondatra idahoensis	species	49335	Irvingtonian		1.8	0.3	938
197278	occ	9442		20319	Mictomys kansasensis	species	48614		Mictomys kansasensis	species	51954	Irvingtonian		1.8	0.3	6294
197279	occ			20319	Erethizon n. sp. cascoensis	species	46318		Erethizon cascoensis	species	45182	Irvingtonian		1.8	0.3	2887
198204	occ	9658		20425	Ophiomys ? parvus	species	49364		Ophiomys parvus	species	48635	Irvingtonian		1.8	0.3	2725
198205	occ			20425	Neotoma sp.	genus	41822		Neotoma	genus	41822	Irvingtonian		1.8	0.3	2725
198297	occ			20442	Leporidae indet.	family	42163		Leporidae	family	42163	Irvingtonian		1.8	0.3	2887
198298	occ			20442	Odocoileus sp.	genus	42682		Odocoileus	genus	42682	Irvingtonian		1.8	0.3	2887
198299	occ			20442	Thomomys cf. gidleyi	species	52277		Thomomys gidleyi	species	52277	Irvingtonian		1.8	0.3	2887
198300	occ			20442	Prodipodomys cf. idahoensis	species	50759		Prodipodomys idahoensis	species	50759	Irvingtonian		1.8	0.3	2887
198301	occ			20442	Peromyscus cf. truei	species	50274		Peromyscus truei	species	46936	Irvingtonian		1.8	0.3	2887
198302	occ	9669		20442	Neotoma sp.	genus	41822		Neotoma	genus	41822	Irvingtonian		1.8	0.3	6294
198303	occ	9670		20442	Terricola cf. meadensis	species	52184	recombined as	Microtus meadensis	species	50378	Irvingtonian		1.8	0.3	2871
198347	occ			20452	Mammuthus cf. columbi	species	47873		Mammuthus columbi	species	46017	Irvingtonian		1.8	0.3	2725
198348	occ			20453	Leporidae indet.	family	42163		Leporidae	family	42163	Irvingtonian		1.8	0.3	2725
198349	occ			20453	Thomomys sp.	genus	41671		Thomomys	genus	41671	Irvingtonian		1.8	0.3	2725
198350	occ			20453	Antilocapridae indet.	family	42720		Antilocapridae	family	42720	Irvingtonian		1.8	0.3	2725
198351	occ			20454	Sorex sp.	genus	40486		Sorex	genus	40486	Irvingtonian		1.8	0.3	2725
198352	occ			20454	Talpidae indet.	family	40398		Talpidae	family	67887	Irvingtonian		1.8	0.3	2725
198353	occ			20454	Chiroptera indet.	order	40622		Chiroptera	order	40622	Irvingtonian		1.8	0.3	2725
198354	occ			20454	Paramylodon harlani	species	49881		Paramylodon harlani	species	48020	Irvingtonian		1.8	0.3	2725
198355	occ			20454	Sylvilagus sp.	genus	42193		Sylvilagus	genus	42193	Irvingtonian		1.8	0.3	2725
198356	occ			20454	Sciuridae indet.	family	41486		Sciuridae	family	41486	Irvingtonian		1.8	0.3	2725
198357	occ			20454	Thomomys bottae	species	52275		Thomomys bottae	species	49453	Irvingtonian		1.8	0.3	2725
198358	occ	9674		20454	Perognathinae indet.	subfamily	370355		Perognathinae	subfamily	370355	Irvingtonian		1.8	0.3	6294
198359	occ			20454	Dipodomys sp.	genus	41678		Dipodomys	genus	41678	Irvingtonian		1.8	0.3	2725
198360	occ			20454	Peromyscus ? sp.	genus	41837		Peromyscus	genus	41837	Irvingtonian		1.8	0.3	2725
198361	occ			20454	Neotoma sp.	genus	41822		Neotoma	genus	41822	Irvingtonian		1.8	0.3	2725
198362	occ	9675		20454	Microtus californicus	species	48573		Microtus californicus	species	44333	Irvingtonian		1.8	0.3	2724
198363	occ			20454	Canis latrans	species	44854		Canis latrans	species	44854	Irvingtonian		1.8	0.3	2725
198364	occ			20454	Mustela sp.	genus	41139		Mustela	genus	41139	Irvingtonian		1.8	0.3	2725
198365	occ			20454	Smilodon fatalis	species	51613		Smilodon fatalis	species	46515	Irvingtonian		1.8	0.3	2725
198366	occ	35593		20454	Mammut pacificus	species	384021		Mammut pacificus	species	384021	Irvingtonian		1.8	0.3	35474
198367	occ	9676		20454	Mammuthus cf. hayi	species	47876		Mammuthus hayi	species	44254	Irvingtonian		1.8	0.3	6294
198368	occ	9677		20454	Equus scotti	species	46305		Equus scotti	species	46305	Irvingtonian		1.8	0.3	6294
198369	occ			20454	Tapirus californicus	species	52060		Tapirus californicus	species	161794	Irvingtonian		1.8	0.3	2725
198370	occ			20454	Tayassuidae ? indet.	family	42420		Tayassuidae	family	42420	Irvingtonian		1.8	0.3	2725
198371	occ			20454	Hemiauchenia sp.	genus	42528		Hemiauchenia	genus	42528	Irvingtonian		1.8	0.3	2724
198372	occ	9678		20454	Camelops cf. hesternus	species	44801		Camelops hesternus	species	44383	Irvingtonian		1.8	0.3	2724
198373	occ			20454	cf. Odocoileus sp.	genus	42682		Odocoileus	genus	42682	Irvingtonian		1.8	0.3	2725
198374	occ			20454	Capromeryx sp.	genus	42722		Capromeryx	genus	42722	Irvingtonian		1.8	0.3	2724
198375	occ			20455	Paramylodon harlani	species	49881		Paramylodon harlani	species	48020	Irvingtonian		1.8	0.3	2725
198376	occ			20456	Paramylodon harlani	species	49881		Paramylodon harlani	species	48020	Irvingtonian		1.8	0.3	2725
198377	occ			20457	Cricetidae ? indet.	family	41724		Cricetidae	family	41724	Irvingtonian		1.8	0.3	2725
198378	occ			20457	Camelops sp.	genus	42520		Camelops	genus	42520	Irvingtonian		1.8	0.3	2725
198379	occ			20458	Leporidae indet.	family	42163		Leporidae	family	42163	Irvingtonian		1.8	0.3	2725
198380	occ			20459	Thomomys sp.	genus	41671		Thomomys	genus	41671	Irvingtonian		1.8	0.3	2725
198381	occ			20460	cf. Scapanus sp.	genus	40425		Scapanus	genus	40425	Irvingtonian		1.8	0.3	2725
198382	occ			20460	Sylvilagus sp.	genus	42193		Sylvilagus	genus	42193	Irvingtonian		1.8	0.3	2725
198383	occ			20460	Leporidae indet.	family	42163		Leporidae	family	42163	Irvingtonian		1.8	0.3	2725
198384	occ			20460	Thomomys sp.	genus	41671		Thomomys	genus	41671	Irvingtonian		1.8	0.3	2725
198385	occ			20460	Dipodomys sp.	genus	41678		Dipodomys	genus	41678	Irvingtonian		1.8	0.3	2725
198386	occ			20460	Peromyscus sp.	genus	41837		Peromyscus	genus	41837	Irvingtonian		1.8	0.3	2725
198387	occ			20460	Neotoma sp.	genus	41822		Neotoma	genus	41822	Irvingtonian		1.8	0.3	2725
198388	occ			20460	Microtus sp.	genus	41810		Microtus	genus	41810	Irvingtonian		1.8	0.3	2725
198389	occ			20461	Equus sp.	genus	42996		Equus	genus	42996	Irvingtonian		1.8	0.3	2725
198390	occ			20462	Leporidae indet.	family	42163		Leporidae	family	42163	Irvingtonian		1.8	0.3	2725
198391	occ			20462	Thomomys sp.	genus	41671		Thomomys	genus	41671	Irvingtonian		1.8	0.3	2725
198392	occ			20462	Peromyscus sp.	genus	41837		Peromyscus	genus	41837	Irvingtonian		1.8	0.3	2725
198393	occ			20462	Microtus sp.	genus	41810		Microtus	genus	41810	Irvingtonian		1.8	0.3	2725
198394	occ			20462	Equus sp.	genus	42996		Equus	genus	42996	Irvingtonian		1.8	0.3	2725
198395	occ	9679		20463	Equus cf. scotti	species	46305		Equus scotti	species	46305	Irvingtonian		1.8	0.3	6294
198396	occ			20464	Sorex sp.	genus	40486		Sorex	genus	40486	Irvingtonian		1.8	0.3	2725
198397	occ			20464	Sylvilagus sp.	genus	42193		Sylvilagus	genus	42193	Irvingtonian		1.8	0.3	2725
198398	occ			20464	Lepus sp.	genus	42176		Lepus	genus	42176	Irvingtonian		1.8	0.3	2725
198399	occ			20464	Sciuridae indet.	family	41486		Sciuridae	family	41486	Irvingtonian		1.8	0.3	2725
198400	occ			20464	Thomomys cf. bottae	species	52275		Thomomys bottae	species	49453	Irvingtonian		1.8	0.3	2725
198401	occ			20464	Dipodomys sp.	genus	41678		Dipodomys	genus	41678	Irvingtonian		1.8	0.3	2725
198402	occ			20464	Peromyscus sp.	genus	41837		Peromyscus	genus	41837	Irvingtonian		1.8	0.3	2725
198403	occ			20464	Microtus sp.	genus	41810		Microtus	genus	41810	Irvingtonian		1.8	0.3	2725
198404	occ			20464	Carnivora ? indet.	order	36905		Carnivora	order	36905	Irvingtonian		1.8	0.3	2725
198405	occ			20464	Equus sp.	genus	42996		Equus	genus	42996	Irvingtonian		1.8	0.3	2725
198406	occ			20465	Thomomys sp.	genus	41671		Thomomys	genus	41671	Irvingtonian		1.8	0.3	2725
198407	occ			20466	Equus sp.	genus	42996		Equus	genus	42996	Irvingtonian		1.8	0.3	2725
198408	occ			20467	Equus sp.	genus	42996		Equus	genus	42996	Irvingtonian		1.8	0.3	2725
198409	occ			20468	Paramylodon sp.	genus	43642		Paramylodon	genus	43642	Irvingtonian		1.8	0.3	2725
198410	occ			20469	Equus sp.	genus	42996		Equus	genus	42996	Irvingtonian		1.8	0.3	2725
198411	occ			20470	Thomomys sp.	genus	41671		Thomomys	genus	41671	Irvingtonian		1.8	0.3	2725
198412	occ	9680		20470	Perognathinae indet.	subfamily	370355		Perognathinae	subfamily	370355	Irvingtonian		1.8	0.3	6294
198413	occ			20470	Dipodomys sp.	genus	41678		Dipodomys	genus	41678	Irvingtonian		1.8	0.3	2725
198414	occ			20470	cf. Microtus sp.	genus	41810		Microtus	genus	41810	Irvingtonian		1.8	0.3	2725
198415	occ			20471	Thomomys sp.	genus	41671		Thomomys	genus	41671	Irvingtonian		1.8	0.3	2725
198416	occ			20472	Sylvilagus sp.	genus	42193		Sylvilagus	genus	42193	Irvingtonian		1.8	0.3	2725
198417	occ			20472	Lepus sp.	genus	42176		Lepus	genus	42176	Irvingtonian		1.8	0.3	2725
198418	occ			20472	cf. Sciuridae indet.	family	41486		Sciuridae	family	41486	Irvingtonian		1.8	0.3	2725
198419	occ			20472	Thomomys bottae	species	52275		Thomomys bottae	species	49453	Irvingtonian		1.8	0.3	2725
198420	occ			20472	Dipodomys sp.	genus	41678		Dipodomys	genus	41678	Irvingtonian		1.8	0.3	2725
198421	occ			20472	Neotoma sp.	genus	41822		Neotoma	genus	41822	Irvingtonian		1.8	0.3	2725
198422	occ			20472	Microtus sp.	genus	41810		Microtus	genus	41810	Irvingtonian		1.8	0.3	2725
198423	occ			20472	Ovis cf. canadensis	species	49517		Ovis canadensis	species	49517	Irvingtonian		1.8	0.3	2725
198424	occ			20473	Thomomys sp.	genus	41671		Thomomys	genus	41671	Irvingtonian		1.8	0.3	2725
198425	occ			20474	Sylvilagus sp.	genus	42193		Sylvilagus	genus	42193	Irvingtonian		1.8	0.3	2725
198563	occ			20486	Equus sp.	genus	42996		Equus	genus	42996	Irvingtonian	Rancholabrean	1.8	0.012	2018
198564	occ			20486	Camelops sp.	genus	42520		Camelops	genus	42520	Irvingtonian	Rancholabrean	1.8	0.012	2018
198565	occ			20486	cf. Hemiauchenia macrocephala	species	46853		Hemiauchenia macrocephala	species	47071	Irvingtonian	Rancholabrean	1.8	0.012	2018
198566	occ			20487	Rodentia indet.	order	41370		Rodentia	order	41370	Irvingtonian	Rancholabrean	1.8	0.012	2018
198567	occ			20487	Mammuthus ? sp.	genus	43266		Mammuthus	genus	43266	Irvingtonian	Rancholabrean	1.8	0.012	2018
198568	occ			20487	Equus sp.	genus	42996		Equus	genus	42996	Irvingtonian	Rancholabrean	1.8	0.012	2018
198569	occ			20487	Camelops sp.	genus	42520		Camelops	genus	42520	Irvingtonian	Rancholabrean	1.8	0.012	2018
198570	occ			20487	Ruminantia indet.	unranked clade	42587		Ruminantia	unranked clade	42587	Irvingtonian	Rancholabrean	1.8	0.012	2018
198571	occ	9724		20487	Paramylodon harlani	species	49881		Paramylodon harlani	species	48020	Irvingtonian	Rancholabrean	1.8	0.012	6294
198572	occ			20488	Equus sp.	genus	42996		Equus	genus	42996	Irvingtonian	Rancholabrean	1.8	0.012	2018
198573	occ			20489	Equus sp.	genus	42996		Equus	genus	42996	Irvingtonian	Rancholabrean	1.8	0.012	2018
198574	occ			20489	Camelops sp.	genus	42520		Camelops	genus	42520	Irvingtonian	Rancholabrean	1.8	0.012	2018
198889	occ	9773		20521	Tapirus californicus	species	52060		Tapirus californicus	species	161794	Irvingtonian	Rancholabrean	1.8	0.012	6294
198890	occ	9774		20521	Equus scotti	species	46305		Equus scotti	species	46305	Irvingtonian	Rancholabrean	1.8	0.012	6294
198891	occ	9775		20522	Mammuthus imperator ?	species	47877	subjective synonym of	Mammuthus columbi	species	46017	Irvingtonian		1.8	0.3	939
198916	occ			20528	Sylvilagus sp.	genus	42193		Sylvilagus	genus	42193	Irvingtonian		1.8	0.3	2887
198917	occ			20528	Lepus sp.	genus	42176		Lepus	genus	42176	Irvingtonian		1.8	0.3	2887
198918	occ			20528	Edentata indet.	order	52943	subjective synonym of	Xenarthra	unranked clade	97907	Irvingtonian		1.8	0.3	2887
198919	occ			20528	Mustelidae indet.	family	41086		Mustelidae	family	41086	Irvingtonian		1.8	0.3	2887
198920	occ			20528	Canis cf. edwardii	species	44838		Canis edwardii	species	44838	Irvingtonian		1.8	0.3	2887
198921	occ			20528	Sorex sp.	genus	40486		Sorex	genus	40486	Irvingtonian		1.8	0.3	2887
198922	occ			20528	Cervidae ? indet.	family	42652		Cervidae	family	42652	Irvingtonian		1.8	0.3	2887
198923	occ			20528	Gomphotheriidae indet.	family	43240		Gomphotheriidae	family	43240	Irvingtonian		1.8	0.3	2887
198924	occ	9778		20528	Tamiini indet.	tribe	91413	subjective synonym of	Marmotini	tribe	92501	Irvingtonian		1.8	0.3	6294
198925	occ			20528	Thomomys sp.	genus	41671		Thomomys	genus	41671	Irvingtonian		1.8	0.3	2887
198926	occ	9779		20528	Perognathinae indet.	subfamily	370355		Perognathinae	subfamily	370355	Irvingtonian		1.8	0.3	6294
198927	occ			20528	Dipodomys sp.	genus	41678		Dipodomys	genus	41678	Irvingtonian		1.8	0.3	2887
198928	occ			20528	Peromyscus sp.	genus	41837		Peromyscus	genus	41837	Irvingtonian		1.8	0.3	2887
198929	occ	9780		20528	Neotoma fuscipes	species	49120		Neotoma fuscipes	species	49120	Irvingtonian		1.8	0.3	939
198930	occ			20528	Microtus californicus	species	48573		Microtus californicus	species	44333	Irvingtonian		1.8	0.3	2887
533431	occ			20173	Succinea sp.	genus	91734		Succinea	genus	91734	Irvingtonian		1.8	0.3	2893
533432	occ			20173	Gila ? sp.	genus	394842		Gila	genus	394842	Irvingtonian		1.8	0.3	2893
533433	occ			20173	Gasterosteus aculeatus	species	307485		Gasterosteus aculeatus	species	307485	Irvingtonian		1.8	0.3	2893
533434	occ			20173	Plethodontinae indet.	subfamily	53072		Plethodontinae	subfamily	53072	Irvingtonian		1.8	0.3	2893
533435	occ			20173	Hyla ? sp.	genus	37471		Hyla	genus	37471	Irvingtonian		1.8	0.3	2893
533436	occ			20173	Bufo sp.	genus	37465		Bufo	genus	37465	Irvingtonian		1.8	0.3	2893
533437	occ	19580		20173	Emydinae indet.	subfamily	53076		Emydinae	subfamily	53076	Irvingtonian		1.8	0.3	19636
533438	occ			20173	Colubridae indet.	family	38127		Colubridae	family	38127	Irvingtonian		1.8	0.3	2893
533439	occ			20173	Crotalus sp.	genus	38159		Crotalus	genus	38159	Irvingtonian		1.8	0.3	2893
533440	occ			20190	Hyla sp.	genus	37471		Hyla	genus	37471	Irvingtonian		1.8	0.3	2893
533441	occ			20190	Colubridae indet.	family	38127		Colubridae	family	38127	Irvingtonian		1.8	0.3	2893
533442	occ			20188	Geochelone sp.	genus	37740		Geochelone	genus	37740	Irvingtonian		1.8	0.3	2893
533443	occ			20199	Colubridae indet.	family	38127		Colubridae	family	38127	Irvingtonian		1.8	0.3	2893
533444	occ			20178	Succinea sp.	genus	91734		Succinea	genus	91734	Irvingtonian		1.8	0.3	2893
533445	occ			20178	Hyla sp.	genus	37471		Hyla	genus	37471	Irvingtonian		1.8	0.3	2893
533446	occ			20178	Geochelone sp.	genus	37740		Geochelone	genus	37740	Irvingtonian		1.8	0.3	2893
533447	occ			20178	Anniella sp.	genus	37994		Anniella	genus	37994	Irvingtonian		1.8	0.3	2893
533448	occ			20178	Sceloporus sp.	genus	37877		Sceloporus	genus	37877	Irvingtonian		1.8	0.3	2893
533449	occ			20178	Gerrhonotus sp.	genus	38001		Gerrhonotus	genus	38001	Irvingtonian		1.8	0.3	2893
533450	occ			20178	Colubridae indet.	family	38127		Colubridae	family	38127	Irvingtonian		1.8	0.3	2893
533451	occ			20178	Crotalus sp.	genus	38159		Crotalus	genus	38159	Irvingtonian		1.8	0.3	2893
533452	occ			20195	Phrynosoma sp.	genus	37874		Phrynosoma	genus	37874	Irvingtonian		1.8	0.3	2893
533453	occ			20182	Bufo sp.	genus	37465		Bufo	genus	37465	Irvingtonian		1.8	0.3	2893
533454	occ			20182	Geochelone sp.	genus	37740		Geochelone	genus	37740	Irvingtonian		1.8	0.3	2893
533455	occ			20182	Anniella sp.	genus	37994		Anniella	genus	37994	Irvingtonian		1.8	0.3	2893
533456	occ	19581		20176	Emydinae indet.	subfamily	53076		Emydinae	subfamily	53076	Irvingtonian		1.8	0.3	19636
533457	occ			20176	Uta stansburiana	species	375856		Uta stansburiana	species	375856	Irvingtonian		1.8	0.3	2893
533458	occ			20177	Plethodontinae indet.	subfamily	53072		Plethodontinae	subfamily	53072	Irvingtonian		1.8	0.3	2893
533459	occ			20177	Hyla sp.	genus	37471		Hyla	genus	37471	Irvingtonian		1.8	0.3	2893
533460	occ	19582		20177	Emydinae indet.	subfamily	53076		Emydinae	subfamily	53076	Irvingtonian		1.8	0.3	19636
533461	occ			20177	Sceloporus sp.	genus	37877		Sceloporus	genus	37877	Irvingtonian		1.8	0.3	2893
533462	occ			20177	Colubridae indet.	family	38127		Colubridae	family	38127	Irvingtonian		1.8	0.3	2893
533463	occ			20177	Natricinae ? indet.	subfamily	53081		Natricinae	subfamily	53081	Irvingtonian		1.8	0.3	2893
534992	occ			55362	Hadrosauridae indet.	family	38755		Hadrosauridae	family	38755	Campanian		83.6	72.1	14863
928412	occ			106180	Mysticeti indet.	suborder	42971		Mysticeti	suborder	42971	Messinian		7.246	5.333	35412
929105	occ			106269	Cetacea indet.	unranked clade	36652		Cetacea	unranked clade	36652	Messinian		7.246	5.333	35412
1217407	occ			19743	Chrysocyon nearcticus	species	300808		Chrysocyon nearcticus	species	300808	Blancan		4.9	1.8	52058
1320723	occ			177611	Odontogryphaea ? haleyi	species	16862	species not entered	Odontogryphaea	genus	16862	Ypresian		56	47.8	58754
1320725	occ			177611	Chedevillia n. sp. saltonensis	species	339063		Chedevillia saltonensis	species	339063	Ypresian		56	47.8	58754
1320726	occ			177611	Eocypraea ? n. sp. maniobraensis	species	340460		Eocypraea maniobraensis	species	340460	Ypresian		56	47.8	58754
1320727	occ	37120		177611	Galeodea sutterensis	species	351952	recombined as	Galeodea (Gomphopages) sutterensis	species	351952	Ypresian		56	47.8	63217
1320729	occ			177611	Volutilithes n. sp. orocopiaensis	species	373646		Volutilithes orocopiaensis	species	373646	Ypresian		56	47.8	58754
1320730	occ			177611	Glossus (Meiocardia) n. sp. susukii	species	373647	recombined as	Meiocardia susukii	species	373647	Ypresian		56	47.8	58754
1320731	occ			177613	Campanilopa dilloni	species	373641		Campanilopa dilloni	species	373641	Ypresian		56	47.8	58754
1320732	occ			177612	Phalium (Semicassis) n. sp. louella	species	373645	recombined as	Galeodea louella	species	373645	Ypresian		56	47.8	58754
1320733	occ			177612	Velates perversus	species	114120		Velates perversus	species	114119	Ypresian		56	47.8	58754
1320734	occ			177611	Glyptoactis mcmasteri	species	17693	species not entered	Glyptoactis	genus	17693	Ypresian		56	47.8	58754
1320735	occ			177614	Turritella meganosensis	species	351963		Turritella meganosensis	species	351963	Ypresian		56	47.8	58754
1320736	occ			177611	Eogryphus cf. tolmani	species	383177		Eogryphus tolmani	species	383177	Ypresian		56	47.8	58754
1320737	occ			177611	Kingena simiensis	species	369036		Kingena simiensis	species	369036	Ypresian		56	47.8	58754
1321334	occ			177714	Aporrhais n. sp. vetus	species	339177	recombined as	Alarimella veta	species	339177	Turonian		93.9	89.8	58802
1394578	occ			20206	Anura indet.	order	150288		Anura	order	97112	Irvingtonian		1.8	0.3	64909
1394579	occ			20206	Chelonia indet.	order	36325	subjective synonym of	Testudines	order	56475	Irvingtonian		1.8	0.3	64909
1394580	occ			20206	Phrynosoma sp.	genus	37874		Phrynosoma	genus	37874	Irvingtonian		1.8	0.3	64909
1394581	occ			20206	Iguanidae indet.	family	37855		Iguanidae	family	37855	Irvingtonian		1.8	0.3	64909
1394582	occ			20206	Lacertilia indet.	suborder	37832		Lacertilia	suborder	37832	Irvingtonian		1.8	0.3	64909
1394583	occ			20206	Sceloporinae indet.		0	taxon not entered				Irvingtonian		1.8	0.3	64909
1394584	occ			20206	Eumeces sp.	genus	37951		Eumeces	genus	37951	Irvingtonian		1.8	0.3	64909
1394585	occ			20206	Anguidae indet.	family	37992		Anguidae	family	37992	Irvingtonian		1.8	0.3	64909
1394586	occ			20206	Anniella sp.	genus	37994		Anniella	genus	37994	Irvingtonian		1.8	0.3	64909
1394587	occ			20206	Colubridae indet.	family	38127		Colubridae	family	38127	Irvingtonian		1.8	0.3	64909
1394588	occ			20206	Aves indet.	class	36616		Aves	class	36616	Irvingtonian		1.8	0.3	64909
1394589	occ			20206	Equus sp.	genus	42996		Equus	genus	42996	Irvingtonian		1.8	0.3	64909
1403018	occ			177611	Astrocoenia dilloni	species	400421		Astrocoenia dilloni	species	400421	Ypresian		56	47.8	65757
1403019	occ			177611	Rotularia sp.	genus	7216		Rotularia	genus	7216	Ypresian		56	47.8	65757
1403020	occ			177611	Amaurellina caleocia	species	59027		Amaurellina caleocia	species	59027	Ypresian		56	47.8	65757
1403021	occ			177611	Arene mcleani	species	387172		Arene mcleani	species	387172	Ypresian		56	47.8	65757
1403022	occ			177611	Bittium cf. preussi	species	384766		Bittium preussi	species	384765	Ypresian		56	47.8	65757
1403023	occ			177611	aff. Cerithiopsis llajasensis	species	383364		Cerithiopsis llajasensis	species	383364	Ypresian		56	47.8	65757
1403024	occ			177611	Clavilithes tabulatus	species	383401		Clavilithes tabulatus	species	383400	Ypresian		56	47.8	65757
1403025	occ			177611	Conus hornii	species	383655		Conus hornii	species	383655	Ypresian		56	47.8	65757
1403026	occ			177611	Cylichnina tantilla	species	383697		Cylichnina tantilla	species	383659	Ypresian		56	47.8	65757
1403027	occ			177611	aff. Domenginella clavtonensis	species	339579	species not entered	Domenginella	genus	339579	Ypresian		56	47.8	65757
1403028	occ			177611	Ectinochilus (Vaderos) elongata	species	337482	species not entered	Ectinochilus (Vaderos)	subgenus	337482	Ypresian		56	47.8	65757
1403029	occ			177611	Eocernina hannibali	species	373717		Eocernina hannibali	species	60239	Ypresian		56	47.8	65757
1403030	occ			177611	Ficopsis remondii	species	383392		Ficopsis remondii	species	383392	Ypresian		56	47.8	65757
1403031	occ			177611	Phalium (Semicassis) louella	species	373645	recombined as	Galeodea louella	species	373645	Ypresian		56	47.8	65757
1403032	occ			177611	Pleurofusia fresnoensis	species	387199	recombined as	Pleurotoma fresnoensis	species	383428	Ypresian		56	47.8	65757
1403033	occ			177611	Turritella buwaldana	species	383356		Turritella buwaldana	species	383356	Ypresian		56	47.8	65757
1403034	occ			177611	Turritella uvasana	species	158352		Turritella uvasana	species	158352	Ypresian		56	47.8	65757
1403035	occ			177611	Corbula (Caryocorbula) cf. dickersoni	species	383701		Corbula (Caryocorbula) dickersoni	species	356103	Ypresian		56	47.8	65757
1403036	occ			177611	Glycymeris (Glycymerita) sagittata ?	species	383677		Glycymeris (Glycymerita) sagittata	species	356077	Ypresian		56	47.8	65757
1403037	occ			177611	Glyptoactis sp.	genus	17693		Glyptoactis	genus	17693	Ypresian		56	47.8	65757
1403038	occ			177611	Ostrea haleyi	species	155441	subjective synonym of	Acutostrea idriaensis	species	94292	Ypresian		56	47.8	65757
1403039	occ			177611	Spondylus cf. carlosensis	species	90293		Spondylus carlosensis	species	90293	Ypresian		56	47.8	65757
1403040	occ			177611	Venericardia (Pacificor) sp.	subgenus	18012		Venericardia (Pacificor)	subgenus	18012	Ypresian		56	47.8	65757
1403041	occ			177614	Eocernina hannibali	species	373717		Eocernina hannibali	species	60239	Ypresian		56	47.8	65757
1403042	occ			177614	Loxotrema ? turritum	species	419874		Loxotrema turritum	species	384682	Ypresian		56	47.8	65757
1403043	occ			177614	Surculites mathewsonii	species	383432		Surculites mathewsonii	species	383431	Ypresian		56	47.8	65757
1403044	occ			177614	Turritella andersoni	species	190000		Turritella andersoni	species	190000	Ypresian		56	47.8	65757
1403045	occ			177614	Acanthocardia (Schedocardia) brewerii	species	168172	recombined as	Schedocardia brewerii	species	168171	Ypresian		56	47.8	65757
1403046	occ			177614	Pitar (Lamelliconcha) cf. joaquinensis	species	369749		Pitar (Lamelliconcha) joaquinensis	species	369749	Ypresian		56	47.8	65757
1403047	occ			193539	Campanile dilloni	species	403412		Campanile dilloni	species	403412	Ypresian		56	47.8	65757
1403048	occ			193539	Eocernina hannibali	species	373717		Eocernina hannibali	species	60239	Ypresian		56	47.8	65757
1403049	occ			193540	Campanile dilloni	species	403412		Campanile dilloni	species	403412	Ypresian		56	47.8	65757
1403050	occ			193540	Eocernina ? hannibali	species	373717		Eocernina hannibali	species	60239	Ypresian		56	47.8	65757
1403051	occ			193541	Clavilithes tabulatus	species	383401		Clavilithes tabulatus	species	383400	Ypresian		56	47.8	65757
1403052	occ			193542	Eocypraea ? maniobraensis	species	340460		Eocypraea maniobraensis	species	340460	Ypresian		56	47.8	65757
1403053	occ			193542	Lyriscapha lajollaensis	species	0	taxon not entered				Ypresian		56	47.8	65757
1403054	occ			193542	Pachycrommium clarki	species	61553		Pachycrommium clarki	species	120495	Ypresian		56	47.8	65757
1403055	occ			193542	Crassatella sp.	genus	17518		Crassatella	genus	17518	Ypresian		56	47.8	65757
1403056	occ			193542	Venericardia (Pacificor) sp.	subgenus	18012		Venericardia (Pacificor)	subgenus	18012	Ypresian		56	47.8	65757
1403057	occ			193544	Astrocoenia ? dilloni	species	400421		Astrocoenia dilloni	species	400421	Ypresian		56	47.8	65757
1403058	occ			193544	Eocernina hannibali	species	373717		Eocernina hannibali	species	60239	Ypresian		56	47.8	65757
1403059	occ			193544	Pachycrommium clarki	species	61553		Pachycrommium clarki	species	120495	Ypresian		56	47.8	65757
1403060	occ			193544	Turritella andersoni	species	190000		Turritella andersoni	species	190000	Ypresian		56	47.8	65757
1403061	occ			193544	Callista (Costacallista) hornii	species	383693	recombined as	Macrocallista (Costacallista) hornii	species	369085	Ypresian		56	47.8	65757
1403062	occ			193544	Venericardia (Pacificor) sp.	subgenus	18012		Venericardia (Pacificor)	subgenus	18012	Ypresian		56	47.8	65757
1403063	occ			193545	Turbinolia dickersoni	species	154811		Turbinolia dickersoni	species	154811	Ypresian		56	47.8	65757
1403064	occ			193545	Calorebama dilleri	species	421533		Calorebama dilleri	species	351956	Ypresian		56	47.8	72738
1403065	occ			193545	Calyptraea dieaoana	species	9583	species not entered	Calyptraea	genus	9583	Ypresian		56	47.8	65757
1403066	occ			193545	Conus hornii	species	383655		Conus hornii	species	383655	Ypresian		56	47.8	65757
1403067	occ			193545	Cylichnina tantilla	species	383697		Cylichnina tantilla	species	383659	Ypresian		56	47.8	65757
1403068	occ			193545	Favartia ? sp.	genus	11118		Favartia	genus	11118	Ypresian		56	47.8	65757
1403069	occ			193545	aff. Homalopoma wattsi	species	190002		Homalopoma wattsi	species	190001	Ypresian		56	47.8	65757
1403070	occ			193545	Pachycrommium clarki	species	61553		Pachycrommium clarki	species	120495	Ypresian		56	47.8	65757
1403071	occ			193545	Turritella andersoni	species	190000		Turritella andersoni	species	190000	Ypresian		56	47.8	65757
1403072	occ			193545	Turritella buwaldana	species	383356		Turritella buwaldana	species	383356	Ypresian		56	47.8	65757
1403073	occ			193545	Acanthocardia (Schedocardia) brewerii	species	168172	recombined as	Schedocardia brewerii	species	168171	Ypresian		56	47.8	65757
1403074	occ			193545	Acila (Truncacila) decisa	species	383668		Acila (Truncacila) decisa	species	383667	Ypresian		56	47.8	65757
1403075	occ			193545	Callista (Costacallista) hornii	species	383693	recombined as	Macrocallista (Costacallista) hornii	species	369085	Ypresian		56	47.8	65757
1403076	occ			193545	Glossus (Meiocardia) susukii	species	373647	recombined as	Meiocardia susukii	species	373647	Ypresian		56	47.8	65757
1403077	occ			193545	Glycymeris (Glycymerita) sagittata ?	species	383677		Glycymeris (Glycymerita) sagittata	species	356077	Ypresian		56	47.8	65757
1403078	occ			193545	Glyptoactis (Claibornicardia) domenginica	species	168151		Glyptoactis (Claibornicardia) domenginica	species	94141	Ypresian		56	47.8	65757
1403079	occ			193545	Pitar (Lamelliconcha) joaquinensis	species	369749		Pitar (Lamelliconcha) joaquinensis	species	369749	Ypresian		56	47.8	65757
1403080	occ			193545	Spondylus cf. carlosensis	species	90293		Spondylus carlosensis	species	90293	Ypresian		56	47.8	65757
1403081	occ			193545	Venericardia (Pacificor) sp.	subgenus	18012		Venericardia (Pacificor)	subgenus	18012	Ypresian		56	47.8	65757
1403082	occ			193547	Eocernina hannibali	species	373717		Eocernina hannibali	species	60239	Ypresian		56	47.8	65757
1403083	occ			193547	Lyria andersoni	species	369094		Lyria andersoni	species	369094	Ypresian		56	47.8	65757
1403084	occ			193547	Pachycrommium clarki	species	61553		Pachycrommium clarki	species	120495	Ypresian		56	47.8	65757
1403085	occ			193547	Turritella andersoni	species	190000		Turritella andersoni	species	190000	Ypresian		56	47.8	65757
1403086	occ			193547	Turritella buwaldana	species	383356		Turritella buwaldana	species	383356	Ypresian		56	47.8	65757
1403087	occ			193547	Callista (Costacallista) hornii	species	383693	recombined as	Macrocallista (Costacallista) hornii	species	369085	Ypresian		56	47.8	65757
1403088	occ			193547	Spondylus cf. carlosensis	species	90293		Spondylus carlosensis	species	90293	Ypresian		56	47.8	65757
1403089	occ			193547	Venericardia (Pacificor) sp.	subgenus	18012		Venericardia (Pacificor)	subgenus	18012	Ypresian		56	47.8	65757
1403090	occ			193548	Dentalium stramineum ?	species	351975		Dentalium stramineum	species	351975	Ypresian		56	47.8	65757
1403091	occ			193548	Pachycrommium clarki	species	61553		Pachycrommium clarki	species	120495	Ypresian		56	47.8	65757
1403092	occ			193548	Turritella andersoni	species	190000		Turritella andersoni	species	190000	Ypresian		56	47.8	65757
1403093	occ			193548	Callista (Costacallista) cf. hornii	species	383693	recombined as	Macrocallista (Costacallista) hornii	species	369085	Ypresian		56	47.8	65757
1403094	occ			193548	Corbula (Caryocorbula) cf. dickersoni	species	383701		Corbula (Caryocorbula) dickersoni	species	356103	Ypresian		56	47.8	65757
1403095	occ			193548	Glyptoactis (Claibornicardia) domenginica	species	168151		Glyptoactis (Claibornicardia) domenginica	species	94141	Ypresian		56	47.8	65757
1403096	occ			193548	Spondylus cf. carlosensis	species	90293		Spondylus carlosensis	species	90293	Ypresian		56	47.8	65757
1403097	occ			193548	Venericardia (Pacificor) sp.	subgenus	18012		Venericardia (Pacificor)	subgenus	18012	Ypresian		56	47.8	65757
1403098	occ			193549	Turritella andersoni	species	190000		Turritella andersoni	species	190000	Ypresian		56	47.8	65757
1403099	occ			193549	Acanthocardia (Schedocardia) brewerii	species	168172	recombined as	Schedocardia brewerii	species	168171	Ypresian		56	47.8	65757
1435969	occ			200313	Mammut n. sp. pacificus	species	384021		Mammut pacificus	species	384021	Rancholabrean		0.3	0.012	35474
1435970	occ			200313	Mammut sp.	genus	43274		Mammut	genus	43274	Rancholabrean		0.3	0.012	35474
1435971	occ			200313	Mammuthus columbi	species	47873		Mammuthus columbi	species	46017	Rancholabrean		0.3	0.012	35474
1435972	occ			200313	Urocyon sp.	genus	41247		Urocyon	genus	41247	Rancholabrean		0.3	0.012	35474
1435973	occ			200313	Sylvilagus sp.	genus	42193		Sylvilagus	genus	42193	Rancholabrean		0.3	0.012	35474
1435974	occ			200313	Scapanus sp.	genus	40425		Scapanus	genus	40425	Rancholabrean		0.3	0.012	35474
1435975	occ			200313	Dipodomys sp.	genus	41678		Dipodomys	genus	41678	Rancholabrean		0.3	0.012	35474
1435976	occ			200313	Thomomys sp.	genus	41671		Thomomys	genus	41671	Rancholabrean		0.3	0.012	35474
1435977	occ			200313	Neotoma sp.	genus	41822		Neotoma	genus	41822	Rancholabrean		0.3	0.012	35474
1435978	occ			200313	Microtus sp.	genus	41810		Microtus	genus	41810	Rancholabrean		0.3	0.012	35474
1435979	occ			200313	Callipepla sp.	genus	291634		Callipepla	genus	291634	Rancholabrean		0.3	0.012	35474
1435980	occ			200313	Colubridae indet.	family	38127		Colubridae	family	38127	Rancholabrean		0.3	0.012	35474
1435981	occ			200313	Anura indet.		0	taxon not entered				Rancholabrean		0.3	0.012	35474
1435982	occ			200314	Mammut pacificus	species	384021		Mammut pacificus	species	384021	Rancholabrean		0.3	0.012	35474
1435988	occ			200319	Mammut pacificus	species	384021		Mammut pacificus	species	384021	Rancholabrean		0.3	0.012	35474
1435989	occ			200320	Mammut californicus	species	43274	species not entered	Mammut	genus	43274	Irvingtonian		1.8	0.3	35474
1435997	occ			200328	Mammut pacificus	species	384021		Mammut pacificus	species	384021	Rancholabrean		0.3	0.012	35474
1435998	occ			20425	Mammut pacificus	species	384021		Mammut pacificus	species	384021	Irvingtonian		1.8	0.3	35474
1439151	occ			20238	Chauliodus eximius	species	352794		Chauliodus eximius	species	352793	Irvingtonian		1.8	0.3	68731
1457596	occ			203409	Eucidaris thouarsii	species	392225	recombined as	Cidaris thouarsii	species	392080	Pliocene		5.333	2.588	32966
1503865	occ			209640	Rimella macilenta	species	285332		Rimella macilenta	species	285332	Ypresian		56	47.8	49270
1527461	occ			177611	Otostoma bisculptata	species	422272		Otostoma bisculptata	species	422271	Ypresian		56	47.8	72892
